# Supplementary material for: Effects of semaglutide on gut microbiota, cognitive function and inflammation in obese mice
Source: PeerJ. 2024 Aug 12;12:e17891. doi: 10.7717/peerj.17891 (PMC11326427; doi:10.7717/peerj.17891)
Supplement: Supplemental Information 1 — Body weight and inflammatory markers in the three groups of mice (n = 6) [file peerj-12-17891-s001.xlsx]

## Sheet: Sheet1
	A	B	C	D
group	body weight	TNF-α(pg/mL)	IL-6（pg/mL)	IL-1β(pg/mL)
NCD_1	23.7	28.174	29.873	4.339
NCD_2	27.1	55.003	12.813	5.876
NCD_3	29.3	56.485	14.272	4.691
NCD_4	27.2	39.803	18.992	6.235
NCD_5	26.9	26.005	16.89	5.028
NCD_6	26.4	53.153	20.439	7.531
HFD_1	39.6	70.66	18.558	6.046
HFD_2	47.7	57.325	26.091	8.346
HFD_3	44	124.618	35.655	7.63
HFD_4	41.5	119.137	26.64	8.146
HFD_5	37.1	66.718	53.598	6.344
HFD_6	35.9	58.322	44.245	7.63
Sema_1	30.6	60.825	20.149	7.531
Sema_2	29.5	31.137	22.677	5.646
Sema_3	30.3	24.428	21.802	6.741
Sema_4	24.5	67.355	32.249	3.422
Sema_5	28.9	14.688	16.963	5.746
Sema_6	26.3	14.688	18.558	4.238
