# Supplementary material for: Effects of semaglutide on gut microbiota, cognitive function and inflammation in obese mice
Source: PeerJ. 2024 Aug 12;12:e17891. doi: 10.7717/peerj.17891 (PMC11326427; doi:10.7717/peerj.17891)
Supplement: Supplemental Information 2 — Semaglutide improve cognitive function (n = 8). (A) The escape latency from the day 1 to day 5. (B) Time spent in the target quadrant (TSTQ) within 1 min at the day 6. (C) The number times of crossing the platform area (NTCPA) within 1 min at the day 6. (D) Total swimming distance (TSD) within 1 min at the day 6. (E) Average swimming speed (ASP) within 1 min at the day 6. n = 8 per group. * p < 0.05 vs NCD and # p < 0.05 vs HFD. [file peerj-12-17891-s002.xlsx]

## Sheet: A
	NCD								HFD								Sema
day/animal	NCD_1	NCD_2	NCD_3	NCD_4	NCD_5	NCD_6	NCD_7	NCD_8	HFD_1	HFD_2	HFD_3	HFD_4	HFD_5	HFD_6	HFD_7	HFD_8	Sema_1	Sema_2	Sema_3	Sema_4	Sema_5	Sema_6	Sema_7	Sema_8
1	34.265	30.04	45.04	36.92	40.35	44.12	35.69	24.48	40.65	38.89	35.31	37.05	35.12	47.77	52.06	60	34.59	42.36	30.5	46.67	31.18	38.52	38	39.58
2	25.62	17.92	28.64	15.58	28.35	23.12	21.44	29.94	24.41	38.86	23.19	30.29	41.84	45.3	24.62	54.46	13.75	17.83	32.51	36.15	12.96	19.93	12.59	11.12
3	10.19	16.29	20.51	15.14	18.15	18.1	10.07	15.83	16.48	23.03	18.45	21.42	33.11	31.23	25.52	30.72	28.23	18.65	14.99	19.12	9.82	11.85	9.52	11.64
4	14.39	10.94	12.7	12.09	15.6	11.53	15.49	11.78	21.14	22.26	20.51	11.58	20.96	17.74	16.75	20.02	13.34	9.48	11.12	16.81	14.55	11.91	9.57	13.76
5	12.6	11.25	12.2	11.13	12.89	10.21	10.34	9.38	18.31	23.7	14.01	15.43	16.48	20.78	17.38	16.34	12.07	10.33	9.19	12.08	8.99	12.11	8.44	8.69

## Sheet: B
group	TSTQ(%)
NCD_1	31.86
NCD_2	41.9
NCD_3	24.55
NCD_4	41.8
NCD_5	39.53
NCD_6	26.29
HFD_1	28.05
HFD_2	23.58
HFD_3	28.18
HFD_4	23.1
HFD_5	18.08
HFD_6	17.1
Sema_1	34.34
Sema_2	23.16
Sema_3	32.95
Sema_4	30.41
Sema_5	35.48
Sema_6	34.45

## Sheet: C
group	NTCPA
NCD_1	3
NCD_2	6
NCD_3	3
NCD_4	4
NCD_5	3
NCD_6	4
HFD_1	3
HFD_2	2
HFD_3	2
HFD_4	0
HFD_5	1
HFD_6	2
Sema_1	4
Sema_2	1
Sema_3	3
Sema_4	4
Sema_5	5
Sema_6	5

## Sheet: D
group	TSDmm	TSDcm
NCD_1	13752.5	1375.26
NCD_2	11908.1	1190.81
NCD_3	10854.8	1085.48
NCD_4	11488.2	1148.83
NCD_5	11554.3	1155.43
NCD_6	11005.6	1100.56
HFD_1	10638.2	1063.82
HFD_2	12068.6	1206.87
HFD_3	9445.76	944.576
HFD_4	11483.2	1148.32
HFD_5	11612.7	1161.27
HFD_6	10542.4	1054.24
Sema_1	10176	1017.61
Sema_2	12349.5	1234.95
Sema_3	13784.5	1378.45
Sema_4	12516	1251.6
Sema_5	10673	1067.3
Sema_6	12164.2	1216.42

## Sheet: E
group	ASPmm/s	ASPcm/s
NCD_1	228.45	22.845
NCD_2	197.81	19.781
NCD_3	180.07	18.007
NCD_4	190.84	19.084
NCD_5	191.8	19.18
NCD_6	182.69	18.269
HFD_1	176.48	17.648
HFD_2	150.34	15.034
HFD_3	207.73	20.773
HFD_4	156.7	15.67
HFD_5	190.5	19.05
HFD_6	192.77	19.277
Sema_1	192.13	19.213
Sema_2	195.14	19.514
Sema_3	218.98	21.898
Sema_4	207.63	20.763
Sema_5	177.29	17.729
Sema_6	202.06	20.206
