# Supplementary material for: Effects of semaglutide on gut microbiota, cognitive function and inflammation in obese mice
Source: PeerJ. 2024 Aug 12;12:e17891. doi: 10.7717/peerj.17891 (PMC11326427; doi:10.7717/peerj.17891)
Supplement: Supplemental Information 7 — The α-diversity and β-diversity of gut microbiota in the three groups. n = 6 per group [file peerj-12-17891-s007.xlsx]

## Sheet: A
sample	ACE
NCD_1	418.69
NCD_2	443.451
NCD_3	443.51
NCD_4	496.95
NCD_5	583.194
NCD_6	333.021
HFD_1	305.164
HFD_2	324.487
HFD_3	391.987
HFD_4	382.47
HFD_5	321.568
HFD_6	322.42
Sema_1	321.827
Sema_2	375.386
Sema_3	301.536
Sema_4	434.275
Sema_5	465.916
Sema_6	431.469

## Sheet: B
sample	Chao1
NCD_1	422.091
NCD_2	453.438
NCD_3	444.625
NCD_4	497.022
NCD_5	585.857
NCD_6	335.731
HFD_1	305.324
HFD_2	333.115
HFD_3	400.294
HFD_4	385.303
HFD_5	330.037
HFD_6	324.118
Sema_1	324.542
Sema_2	374.067
Sema_3	313.652
Sema_4	430.294
Sema_5	500.241
Sema_6	440.886

## Sheet: C
sample	Shannon
NCD_1	6.3035
NCD_2	6.265
NCD_3	6.953
NCD_4	6.6341
NCD_5	7.265
NCD_6	5.8457
HFD_1	4.7007
HFD_2	5.2961
HFD_3	5.5177
HFD_4	5.9978
HFD_5	5.5339
HFD_6	5.1649
Sema_1	4.3777
Sema_2	4.3211
Sema_3	3.9869
Sema_4	5.6971
Sema_5	5.4804
Sema_6	5.274

## Sheet: D
sample	Simpson
NCD_1	0.9704
NCD_2	0.9615
NCD_3	0.9782
NCD_4	0.9769
NCD_5	0.9858
NCD_6	0.9567
HFD_1	0.9196
HFD_2	0.9434
HFD_3	0.9448
HFD_4	0.9638
HFD_5	0.9597
HFD_6	0.9319
Sema_1	0.8294
Sema_2	0.8761
Sema_3	0.8427
Sema_4	0.9502
Sema_5	0.9321
Sema_6	0.9238

## Sheet: E
sample	Axis.1	Axis.2
HFD_1	-0.173138	-0.207859
HFD_2	0.0828174	-0.185782
HFD_3	0.155832	-0.132762
HFD_4	0.140391	-0.22059
HFD_5	0.134317	-0.178179
HFD_6	0.136812	-0.201784
NCD_1	-0.292062	0.0324772
NCD_2	-0.0767847	0.105553
NCD_3	-0.0807495	0.113496
NCD_4	-0.311862	0.0279129
NCD_5	-0.273497	0.052388
NCD_6	-0.295634	-0.04491
Sema_1	0.140886	0.0228002
Sema_2	0.147417	0.159821
Sema_3	0.155914	0.161678
Sema_4	0.14993	0.13859
Sema_5	0.129145	0.159461
Sema_6	0.130266	0.19769
