# Supplementary material for: Effects of semaglutide on gut microbiota, cognitive function and inflammation in obese mice
Source: PeerJ. 2024 Aug 12;12:e17891. doi: 10.7717/peerj.17891 (PMC11326427; doi:10.7717/peerj.17891)
Supplement: Supplemental Information 8 — The composition of gut microbiota in the three groups. [file peerj-12-17891-s008.xlsx]

## Sheet: A
Tax	NCD_1	NCD_2	NCD_3	NCD_4	NCD_5	NCD_6	HFD_1	HFD_2	HFD_3	HFD_4	HFD_5	HFD_6	Sema_1	Sema_2	Sema_3	Sema_4	Sema_5	Sema_6
k__Bacteria|p__Bacteroidota|c__Bacteroidia|o__Bacteroidales|f__Muribaculaceae|g__Muribaculaceae	0.467335	0.514433	0.459389	0.441041	0.482266	0.479503	0.00387686	0.0274451	0.0529326	0.0110932	0.012168	0.0217258	0.0198449	0.0290189	0.0197682	0.0274451	0.0541225	0.0517811
k__Bacteria|p__Firmicutes|c__Bacilli|o__Lactobacillales|f__Lactobacillaceae|g__Lactobacillus	0.154268	0.165323	0.106172	0.149662	0.0647935	0.301282	0.138953	0.0323584	0.0988408	0.0595348	0.128704	0.0625672	0.051973	0.2115	0.166705	0.0573852	0.089283	0.147282
k__Bacteria|p__Verrucomicrobiota|c__Verrucomicrobiae|o__Verrucomicrobiales|f__Akkermansiaceae|g__Akkermansia	0.00118993	0.0362352	0.00364655	0.0319745	0.000383848	0.0262168	0.000230309	0.000345463	0.00168893	0.00191924	0.00134347	3.83848e-05	0.0116306	0.23645	0.334293	0.151581	0.0866728	0.105788
k__Bacteria|p__Firmicutes|c__Bacilli|o__Erysipelotrichales|f__Erysipelotrichaceae|g__uncultured	0.00245663	0.0012667	0.00522033	0.00157378	0.00840626	0.00138185	0.0226854	0.268617	0.27948	0.0246046	0.1421	0.103101	0.119914	0.180869	0.148511	0.041302	0.124098	0.120413
k__Bacteria|p__Actinobacteriota|c__Coriobacteriia|o__Coriobacteriales|f__Atopobiaceae|g__uncultured	0.00475971	0.00902042	0.00333947	0.0101336	0.0017657	0.0105174	0.00460617	0.00399202	0.0202672	0.00284047	0.00145862	0.00936588	0.382466	0.102602	0.113542	0.0792262	0.189237	0.187471
k__Bacteria|p__Firmicutes|c__Clostridia|o__Lachnospirales|f__Lachnospiraceae|g__uncultured	0.011976	0.00687087	0.0284047	0.011477	0.0284047	0.00168893	0.0129741	0.0156226	0.0432212	0.265507	0.0305159	0.00491325	0.00510517	0.0110932	0.00863657	0.0195378	0.00879011	0.0145478
k__Bacteria|p__Firmicutes|c__Bacilli|o__Erysipelotrichales|f__Erysipelotrichaceae|g__Dubosiella	0.109128	0.0150084	0.0603025	0.0494012	0.0566559	0.0358514	0.287464	0.153769	0.118762	0.0819515	0.141525	0.107362	0.0541609	0.0411485	0.027637	0.0204591	0.030631	0.0371565
k__Bacteria|p__Firmicutes|c__Clostridia|o__Peptostreptococcales-Tissierellales|f__Peptostreptococcaceae|g__Romboutsia	0.0017657	0.00107477	0	0.00142024	0.00142024	0.00130508	0.265162	0.0376555	0.0198833	0.0672501	0.0754645	0.272263	0.0202672	0.0159297	0.0144327	0.00617995	0.0162368	0.011477
k__Bacteria|p__Bacteroidota|c__Bacteroidia|o__Bacteroidales|f__Marinifilaceae|g__Odoribacter	0.00245663	0.00291724	0.00299401	0.00349301	0.00483648	0.000345463	0.000575772	0.183479	0.0105942	0.00249501	0.179909	0.0274067	0.0075618	0.00598802	0.0030324	0.0971135	0.0246814	0.0148933
k__Bacteria|p__Desulfobacterota|c__Desulfovibrionia|o__Desulfovibrionales|f__Desulfovibrionaceae|g__uncultured	0.00188085	0.00115154	0.0027637	0.0057961	0.00368494	0.00115154	0.000767695	0.0348534	0.0523568	0.0329725	0.0265623	0.0174267	0.0134347	0.0045294	0.00383848	0.0303624	0.0205742	0.00794565
k__Bacteria|p__Firmicutes|c__Clostridia|o__Oscillospirales|f__Oscillospiraceae|g__uncultured	0.00464456	0.0088285	0.00921234	0.013665	0.0138185	0.000499002	0.000153539	0.0169661	0.0100184	0.00203439	0.00744665	0.000537387	0.00506679	0.0173883	0.0228389	0.106595	0.0274067	0.0377706
k__Bacteria|p__Firmicutes|c__Bacilli|o__uncultured	0.0194995	0.00460617	0.00445263	0.00368494	0.00172731	0.00310917	0.137763	0.010671	0.0785352	0.0824505	0.0442576	0.0766928	0.0214187	0.00905881	0.00414556	0.00449102	0.0133579	0.00713957
k__Bacteria|p__Firmicutes|c__Clostridia|o__Lachnospirales|f__Lachnospiraceae|g__Lachnospiraceae_NK4A136_group	0.00525871	0.0161984	0.0462153	0.0540074	0.0451789	0.00195762	0.00272532	0.00291724	0.025641	0.0275219	0.00422232	0.00165055	0.00641026	0.00214955	0.00310917	0.00725472	0.0203823	0.013166
k__Bacteria|p__Actinobacteriota|c__Coriobacteriia|o__Coriobacteriales|f__Eggerthellaceae|g__Enterorhabdus	0.00399202	0.0105942	0.00533548	0.0192308	0.00836788	0.00575772	0.00821434	0.0533164	0.0193459	0.0356211	0.0373484	0.111469	0.00994166	0.00364655	0.00122831	0.00598802	0.0102871	0.00222632
k__Bacteria|p__Desulfobacterota|c__Desulfovibrionia|o__Desulfovibrionales|f__Desulfovibrionaceae|g__Desulfovibrio	0.00138185	0.0115154	0.00533548	0.0109397	0.0128973	0.00245663	0.00184247	0.00644864	0.0181176	0.126017	0.0062951	0.00314755	0.00234147	0.00261016	0.000460617	0.00345463	0.00245663	0.00107477
k__Bacteria|p__Actinobacteriota|c__Coriobacteriia|o__Coriobacteriales|f__Atopobiaceae|g__Coriobacteriaceae_UCG-002	0.00115154	0.00184247	0	0.00103639	0.000575772	0.0027637	0.00287886	0.0017657	0.00387686	0.00245663	0.0027637	0.00418394	0.122179	0.030823	0.0301704	0.0217258	0.092776	0.0498618
k__Bacteria|p__Bacteroidota|c__Bacteroidia|o__Bacteroidales|f__Rikenellaceae|g__Rikenella	0.00165055	0.00449102	0.0040304	0.00180408	0.0065638	0.000729311	0.000383848	0.0507447	0.0295179	0.00902042	0.0381161	0.0400353	0.00284047	0.00130508	0.000499002	0.018655	0.00986489	0.0030324
k__Bacteria|p__Firmicutes|c__Clostridia|o__Clostridia_UCG-014|f__Clostridia_UCG-014|g__Clostridia_UCG-014	0.00717795	0.0164287	0.0279825	0.0223016	0.0299401	0.00149701	0.000268693	0.000614156	0.000191924	0.000345463	0.000345463	0	0.00299401	0.00637187	0.0124367	0.101681	0.0177721	0.0134347
k__Bacteria|p__Deferribacterota|c__Deferribacteres|o__Deferribacterales|f__Deferribacteraceae|g__Mucispirillum	0.000383848	0.000422232	0.00230309	0.00111316	0.00736988	0.000191924	0.000230309	0.000268693	0.0179257	0.000921234	0.000537387	0.00368494	0.0131276	0.000268693	7.67695e-05	7.67695e-05	0.00487487	0.000383848
k__Bacteria|p__Firmicutes|c__Bacilli|o__Lactobacillales|f__Aerococcaceae|g__Aerococcus	0.000499002	0.000690926	0.00088285	0.000844465	0.000307078	0.000767695	0.0220712	0.00840626	0.000230309	0.00840626	0.00130508	0.0414172	0.00138185	0.00134347	0.00130508	0.00264855	0.000959619	0.000345463
k__Bacteria|p__Firmicutes|c__Clostridia|o__Oscillospirales|f__[Eubacterium]_coprostanoligenes_group|g__[Eubacterium]_coprostanoligenes_group	0.000729311	0.000153539	0.000268693	0	3.83848e-05	0.000460617	7.67695e-05	0	0.000921234	0.000844465	0.000191924	0.000422232	0.00237986	0.00671733	0.0140104	0.0263703	0.0202672	0.029825
k__Bacteria|p__Firmicutes|c__Clostridia|o__Clostridiales|f__Clostridiaceae|g__Clostridium_sensu_stricto_1	0	3.83848e-05	0.00107477	0.000499002	0.000115154	0.000422232	0.000767695	0.0022647	0.0047981	0.000729311	0.00115154	0.000422232	0.0145478	0.010479	0.0107861	0.0125518	0.0118225	0.0204207
k__Bacteria|p__Patescibacteria|c__Saccharimonadia|o__Saccharimonadales|f__Saccharimonadaceae|g__Candidatus_Saccharimonas	0.00115154	0.00675572	0.00621833	0.00429909	0.00767695	0.000652541	0.0258329	0.00871334	0.00295563	0.0234531	0.041801	0.00372332	0.00234147	0.0017657	0.00172731	0.00356978	0.0065638	0.000921234
k__Bacteria|p__Actinobacteriota|c__Actinobacteria|o__Bifidobacteriales|f__Bifidobacteriaceae|g__Bifidobacterium	0.0409182	0.00195762	0.011669	0.000959619	0.0127054	0.00337786	0.000383848	0.0022647	0.00168893	0.00134347	0.00115154	0.00115154	0.0204207	0.00840626	0.00809919	0.00621833	0.00610318	0.00617995
k__Bacteria|p__Firmicutes|c__Bacilli|o__Erysipelotrichales|f__Erysipelotrichaceae|g__Allobaculum	0.0110932	0.0555044	0.0153155	0.0514356	0.0210349	0.0284047	0.000153539	0.000499002	0.000191924	0.000383848	0.000345463	0	7.67695e-05	3.83848e-05	3.83848e-05	0.000575772	0.000115154	0
k__Bacteria|p__Proteobacteria|c__Gammaproteobacteria|o__Pseudomonadales|f__Moraxellaceae|g__Psychrobacter	0	0.000307078	0.000460617	3.83848e-05	7.67695e-05	0.000959619	0.000767695	0.000460617	0.000690926	0.000575772	7.67695e-05	0.00326271	0.000383848	0.000268693	0	0.000307078	0.000383848	0.000614156
k__Bacteria|p__Firmicutes|c__Bacilli|o__Lactobacillales|f__Enterococcaceae|g__Enterococcus	0.00310917	0.00456779	0.00836788	0.0040304	0.00614156	0.00280209	0.0045294	0.00234147	0.00299401	0.00237986	0.00414556	0.0017657	0.00506679	0.000268693	0.000153539	0.00122831	0.00349301	0.00153539
k__Bacteria|p__Firmicutes|c__Clostridia|o__Lachnospirales|f__Lachnospiraceae|g__Blautia	0.000575772	0	0.000345463	0	0.000998004	0.000268693	0.000575772	0.00272532	0.010479	0.00836788	0.00257178	0.00191924	0.000153539	0.000115154	0	0.00088285	0.000690926	0
k__Bacteria|p__Firmicutes|c__Clostridia|o__Oscillospirales|f__Oscillospiraceae|g__Colidextribacter	0.00218793	0.00103639	0.00464456	0.00130508	0.0035314	0.000345463	0	0.00134347	0.00694764	0.000499002	0.000652541	0.000460617	0.000460617	0.00522033	0.000499002	0.00621833	0.00287886	0.00426071
k__Bacteria|p__Firmicutes|c__Clostridia|o__Oscillospirales|f__Ruminococcaceae|g__uncultured	0.000575772	0.000268693	0.00107477	0.00195762	0.00115154	0.000268693	0	0.00380009	0.00721634	0.00591125	0.00307078	0.00752341	0.000729311	0.000345463	0.00080608	0.0035314	0.00299401	0.00322432
k__Bacteria|p__Firmicutes|c__Bacilli|o__RF39|f__RF39|g__RF39	0.000998004	0.0133579	0.00230309	0.000844465	0.00356978	0.000998004	0	0	3.83848e-05	0	0	0	0.00142024	0.0030324	0.00518194	0.00445263	0.00460617	0.00610318
k__Bacteria|p__Bacteroidota|c__Bacteroidia|o__Bacteroidales|f__Rikenellaceae|g__Rikenellaceae_RC9_gut_group	0.00195762	0.00111316	0.00261016	0.00180408	0.00349301	0.000614156	0.000115154	0.0166974	0.00948104	0.000307078	0.0166206	0.0027637	0.00134347	0.00218793	0.000575772	0.00080608	0.00667895	0.00287886
k__Bacteria|p__Campilobacterota|c__Campylobacteria|o__Campylobacterales|f__Helicobacteraceae|g__Helicobacter	0.00161216	0.000575772	0.00322432	0.00345463	0.00433748	0.000153539	0	0.000307078	0.00537387	0.000614156	7.67695e-05	0.00364655	0.00859819	0.000191924	0.000268693	0.00264855	0.00230309	0.00610318
k__Bacteria|p__Bacteroidota|c__Bacteroidia|o__Bacteroidales|f__Rikenellaceae|g__Alistipes	0.00322432	0.00253339	0.00671733	0.00372332	0.00944265	0.000690926	0.000690926	0.00261016	0.00111316	0.00153539	0.00261016	0.00145862	0.00241824	0.000921234	0.000460617	0.0050284	0.0050284	0.00230309
k__Bacteria|p__Firmicutes|c__Bacilli|o__Erysipelotrichales|f__Erysipelotrichaceae|g__Faecalibaculum	0.00218793	0.00376171	0.00172731	0.00445263	0.00499002	0.00495164	0.000575772	0.00284047	0.00157378	0.00080608	0.00195762	0.000921234	0.00299401	0.00122831	0.000690926	0.00165055	0.00134347	0.000383848
k__Bacteria|p__Actinobacteriota|c__Actinobacteria|o__Corynebacteriales|f__Corynebacteriaceae|g__Corynebacterium	0.000268693	0.000191924	0.000690926	0.000230309	0.000191924	0.000230309	0.00157378	0.000153539	0	0.00376171	0.000191924	0.00191924	0.00138185	0.00333947	0.00134347	0.00138185	0.00107477	0.00088285
k__Bacteria|p__Proteobacteria|c__Gammaproteobacteria|o__Enterobacterales|f__Enterobacteriaceae|g__Escherichia-Shigella	0.00249501	0.00149701	0.00211116	0.00115154	0.00180408	0.00383848	0.00111316	0.000652541	0.0027637	0.00249501	0.00130508	0.00115154	0.0067941	0.00218793	0.000652541	0.00188085	0.00118993	0.00165055
k__Bacteria|p__Bacteroidota|c__Bacteroidia|o__Bacteroidales|f__Bacteroidaceae|g__Bacteroides	0.00740826	0.00376171	0.00794565	0.00441425	0.0100952	0.00287886	0.000345463	0.0012667	0.00130508	0.00142024	0.00145862	0.00268693	0.00122831	0.000191924	0.000307078	0.000499002	0.00598802	0.00272532
k__Bacteria|p__Firmicutes|c__Bacilli|o__Lactobacillales|f__Streptococcaceae|g__Streptococcus	0.000499002	0.00241824	0.00264855	0.00138185	0.00103639	0.00118993	0.00829111	0.00314755	0.00199601	0.00510517	0.00391525	0.00545064	0.00253339	0.00122831	0.00145862	0.00207278	0.00241824	0.00107477
k__Bacteria|p__Firmicutes|c__Clostridia|o__Lachnospirales|f__Lachnospiraceae|g__[Eubacterium]_xylanophilum_group	0.00188085	0.00107477	0.0157761	0.00130508	0.0163903	0.000230309	0	0	3.83848e-05	0.00399202	0.000115154	0.000191924	0.000537387	0.000268693	0.00149701	0.00237986	0.00211116	0.00207278
k__Bacteria|p__Firmicutes|c__Clostridia|o__Lachnospirales|f__Lachnospiraceae|g__Dorea	0	0	0	0	0	0.000307078	0	0	0	0	0	3.83848e-05	0.000690926	0.00349301	0.00195762	0.0475971	0.00184247	0.00468294
k__Bacteria|p__Firmicutes|c__Clostridia|o__Oscillospirales|f__Ruminococcaceae|g__Incertae_Sedis	3.83848e-05	0.0045294	0.00395363	0.00429909	0.00767695	3.83848e-05	0	0.00130508	0.000422232	0.0223399	0.000575772	0.000230309	7.67695e-05	0	0	0.000345463	0.000191924	0.000959619
k__Bacteria|p__Firmicutes|c__Clostridia|o__Peptostreptococcales-Tissierellales|f__Anaerovoracaceae|g__uncultured	3.83848e-05	3.83848e-05	0	0	0	0	0	0	7.67695e-05	0.000307078	0	0	0.00468294	0.00222632	0.00752341	0.00460617	0.00875173	0.00736988
k__Bacteria|p__Firmicutes|c__Bacilli|o__Staphylococcales|f__Staphylococcaceae|g__Staphylococcus	0	0.000729311	0	0	0.000230309	0.000268693	0.00295563	0.000767695	0.000307078	0.00153539	0.000268693	0.00752341	0.000115154	0.000575772	0.00080608	0.000153539	0.000115154	0.000307078
k__Bacteria|p__Firmicutes|c__Clostridia|o__Oscillospirales|f__Oscillospiraceae|g__Oscillibacter	0.000230309	0.000115154	0.000729311	0.000767695	0.000959619	0	0	0.000230309	0.00449102	0.00088285	0.000115154	0.000153539	0.000191924	0.00237986	0.00157378	0.00157378	0.00211116	0.00468294
k__Bacteria|p__Actinobacteriota|c__Coriobacteriia|o__Coriobacteriales|f__Eggerthellaceae|g__Parvibacter	0.000230309	0.00080608	0	0.000614156	0	0.000729311	0.000614156	0.00514356	0.00218793	0.0107477	0.00606479	0	0.000575772	0.000998004	0.00111316	0.00222632	0.000844465	0.000652541
k__Bacteria|p__Bacteroidota|c__Bacteroidia|o__Bacteroidales|f__Prevotellaceae|g__uncultured	0.03232	0.0050284	0.00387686	0.00418394	0.00449102	0.00422232	7.67695e-05	0	0	0	0	0	0.000115154	3.83848e-05	3.83848e-05	0.000153539	7.67695e-05	0.000268693
k__Bacteria|p__Bacteroidota|c__Bacteroidia|o__Bacteroidales|f__Prevotellaceae|g__Alloprevotella	0.0189621	0.00310917	0.00560418	0.00786888	0.00660218	0.00395363	3.83848e-05	0	0	7.67695e-05	3.83848e-05	3.83848e-05	0	0.000115154	7.67695e-05	0.000767695	0.000998004	0.000153539
k__Bacteria|p__Firmicutes|c__Clostridia|o__Peptostreptococcales-Tissierellales|f__Anaerovoracaceae|g__Family_XIII_AD3011_group	0.000345463	0.000422232	0.000383848	0.000268693	0.000307078	0	0	0	0	0	0	0	0.000537387	0.0017657	0.000767695	0.00387686	0.00172731	0.0012667
k__Bacteria|p__Firmicutes|c__Clostridia|o__Oscillospirales|f__Ruminococcaceae|g__Anaerotruncus	0.000460617	0	0	7.67695e-05	0.000191924	0	0.000115154	0.000499002	0.00168893	0.00571933	0.00161216	0.00237986	0.000383848	0	0	0.000191924	0.000307078	0.000191924
k__Bacteria|p__Firmicutes|c__Clostridia|o__Oscillospirales|f__Oscillospiraceae|g__NK4A214_group	7.67695e-05	0.000767695	0.000729311	0.000690926	0.000921234	0.000499002	0	0.00153539	0	0	0.00103639	0	0.00080608	0.000537387	0.00199601	0.00660218	0.00284047	0.00387686
k__Bacteria|p__Bacteroidota|c__Bacteroidia|o__Bacteroidales|f__Tannerellaceae|g__Parabacteroides	0.0035314	0.00130508	0.00207278	0.0012667	0.00333947	0.00291724	0	0.00410717	0.00518194	0.000422232	0.00157378	0.00168893	0.0012667	0.000345463	0.000191924	0.000460617	0.00188085	0.00088285
k__Bacteria|p__Proteobacteria|c__Gammaproteobacteria|o__Burkholderiales|f__Sutterellaceae|g__Parasutterella	0.0116306	0.00103639	0.00291724	0.00188085	0.00349301	0.0147014	0	0.000115154	7.67695e-05	0	0	0	0.000998004	7.67695e-05	0.000153539	3.83848e-05	0.00130508	0.00253339
k__Bacteria|p__Firmicutes|c__Bacilli|o__Mycoplasmatales|f__Mycoplasmataceae|g__Mycoplasma	0.00261016	0.00180408	0.0127054	0.0027637	0.0177338	0.000499002	0	0	0	0	0	0	0	0	0	0	0	0
k__Bacteria|p__Firmicutes|c__Clostridia|o__Lachnospirales|f__Lachnospiraceae|g__Anaerostipes	0	0	0	0	0	0	0	0	0	0	0	0	0.000383848	0	0	0	0.00261016	0
k__Bacteria|p__Firmicutes|c__Clostridia|o__Monoglobales|f__Monoglobaceae|g__Monoglobus	0	0	0.000460617	7.67695e-05	0.000537387	0	0.00122831	0.000422232	0.000383848	0.00180408	0.000383848	0	0.000230309	0.000537387	0.0012667	0.00391525	0.00145862	0.00165055
k__Bacteria|p__Firmicutes|c__Clostridia|o__Oscillospirales|f__UCG-010|g__UCG-010	0.000959619	0.00237986	0.000537387	0.0012667	0.000690926	0	0	0	0.000191924	0	3.83848e-05	0	0.000115154	0.000191924	0.000307078	0.00103639	0.00211116	0.00280209
k__Bacteria|p__Firmicutes|c__Clostridia|o__Peptococcales|f__Peptococcaceae|g__uncultured	0.000191924	0.000268693	0.000307078	0.000959619	0.000767695	0	0.000153539	0.00088285	0.00333947	0.00230309	0.00153539	0.000422232	7.67695e-05	0.000345463	0.000460617	0.00103639	0.000307078	0.000460617
k__Bacteria|p__Firmicutes|c__Clostridia|o__Christensenellales|f__Christensenellaceae|g__Christensenellaceae_R-7_group	0.000191924	0.000191924	0.00111316	0.000115154	0.00138185	0	0	0	7.67695e-05	0	0	0	0	0.000690926	0.000767695	0.00080608	0.00134347	0.00318594
k__Bacteria|p__Proteobacteria|c__Gammaproteobacteria|o__Enterobacterales|f__Enterobacteriaceae|g__uncultured	0.00318594	0.00360817	0	0.00257178	0.00195762	0.000575772	0.000153539	0.00199601	0	0	0	0	0	0	0	0	0.000690926	0.000460617
k__Bacteria|p__Firmicutes|c__Clostridia|o__Oscillospirales|f__Butyricicoccaceae|g__UCG-009	0	0	0	0	0	0	0	0	0.000115154	0	0	0	0.000307078	0.00165055	0.0012667	0.00326271	0.00111316	0.00767695
k__Bacteria|p__Firmicutes|c__Clostridia|o__Lachnospirales|f__Lachnospiraceae|g__Lachnoclostridium	0.000537387	0.000383848	0.00107477	0.000729311	0	7.67695e-05	0.000959619	0.00107477	0.00080608	0.000499002	0.00234147	0.00118993	3.83848e-05	0	0.000422232	0.000230309	0.000844465	0.000690926
k__Bacteria|p__Firmicutes|c__Clostridia|o__Lachnospirales|f__Lachnospiraceae|g__Roseburia	0	0	0.00326271	0	0.00184247	0	0	0	0.00172731	0.00142024	0.000153539	7.67695e-05	0	0	0	0	0	0.000115154
k__Bacteria|p__Firmicutes|c__Clostridia|o__Lachnospirales|f__Lachnospiraceae|g__Lachnospiraceae_UCG-006	0.000115154	0.00522033	0.00115154	0.00080608	0.000844465	0	0	0.000115154	0.000537387	0.000422232	0.000230309	3.83848e-05	0	3.83848e-05	0	0.000115154	0	0
k__Bacteria|p__Firmicutes|c__Bacilli|o__Staphylococcales|f__Staphylococcaceae|g__Jeotgalicoccus	0	0	0	0	0	0	0.00621833	0	0	0.00429909	0.000115154	0.0017657	0	0	0	0	3.83848e-05	0
k__Bacteria|p__Firmicutes|c__Bacilli|o__Lactobacillales|f__Streptococcaceae|g__Lactococcus	0	0	0.00107477	0.000115154	0	0.000115154	0.00441425	0.000959619	0.000729311	0.00222632	0.000959619	0.00203439	0.000690926	0.000499002	0.000153539	0.000191924	0.000153539	0.000230309
k__Bacteria|p__Firmicutes|c__Clostridia|o__uncultured	7.67695e-05	0.000153539	0	0.000115154	0	0	0.000115154	0.000153539	0.000191924	0.00898204	0.000115154	0.000153539	0	0.000422232	0.000115154	0.000422232	0.000345463	0.000499002
k__Bacteria|p__Proteobacteria|c__Alphaproteobacteria|o__Sphingomonadales|f__Sphingomonadaceae|g__Sphingomonas	0.000499002	0.00122831	0.00203439	0.00080608	0.00184247	0.00245663	0.000767695	0.00080608	0.000844465	0.00188085	0.000690926	0.000383848	0.00130508	0.00088285	0.000345463	0.000115154	0.000844465	0.000614156
k__Bacteria|p__Firmicutes|c__Clostridia|o__Peptostreptococcales-Tissierellales|f__Peptostreptococcaceae|g__Paraclostridium	0.00122831	0.00180408	0.00621833	0.00368494	0.00261016	0	0.00088285	0.000998004	0.00118993	0.00172731	0.00118993	0	0	0	0	0	0	0
k__Bacteria|p__Firmicutes|c__Clostridia|o__Oscillospirales|f__Ruminococcaceae|g__Ruminococcaceae	0	0	0.000191924	0	0.000614156	0	0	0	0	0	0	0	0.000115154	0.000191924	0.000307078	0	0.000652541	0.00153539
k__Bacteria|p__Proteobacteria|c__Gammaproteobacteria|o__Burkholderiales|f__Neisseriaceae|g__Neisseria	0	0	0	0.000345463	0	0	3.83848e-05	0.000230309	0.000307078	0.00115154	0.000460617	0.000153539	0.00568095	0.00153539	0.000383848	0.00111316	0.000998004	0.00161216
k__Bacteria|p__Firmicutes|c__Clostridia|o__Peptostreptococcales-Tissierellales|f__Anaerovoracaceae|g__[Eubacterium]_brachy_group	0.000268693	0	0	0.000153539	0.000115154	0	0	0	0.00080608	0	0	3.83848e-05	0.000191924	0.000115154	7.67695e-05	0.000537387	0.000767695	0.000115154
k__Bacteria|p__Actinobacteriota|c__Actinobacteria|o__Micrococcales|f__Micrococcaceae|g__Rothia	0	0.00199601	0.00180408	0.00111316	0.00088285	0.00088285	0.000383848	0.000767695	0.000383848	0.000460617	0.000383848	3.83848e-05	0.00161216	0.000959619	0.000652541	0.00080608	0.000345463	0.000690926
k__Bacteria|p__Firmicutes|c__Bacilli|o__Lactobacillales|f__Carnobacteriaceae|g__Carnobacterium	0	0	0	0	0	0	0	0	0	0	0	0	0	0	0	0	0	0
k__Bacteria|p__Firmicutes|c__Bacilli|o__Erysipelotrichales|f__Erysipelotrichaceae|g__Turicibacter	0.00138185	0	0.00241824	0	0.00414556	0.00138185	3.83848e-05	0	0	0.000115154	0	0	0.000652541	0.000575772	0	0.000307078	7.67695e-05	0.000690926
k__Bacteria|p__Proteobacteria|c__Alphaproteobacteria|o__Rhodobacterales|f__Rhodobacteraceae|g__Marivivens	0.00080608	0.000729311	0.0017657	0.00257178	0.00168893	0.00165055	0.000345463	0.000537387	7.67695e-05	0.000575772	0.000614156	0.000268693	0	0	0	0.0012667	0.00145862	0.000959619
k__Bacteria|p__Proteobacteria|c__Gammaproteobacteria|o__Pseudomonadales|f__Pseudomonadaceae|g__Pseudomonas	0.00088285	0.000307078	0.0128589	0	0	0.000230309	0.000230309	0	0	3.83848e-05	0	0	0	0	3.83848e-05	0	0	0
k__Bacteria|p__Firmicutes|c__Clostridia|o__Eubacteriales|f__Eubacteriaceae|g__uncultured	0	0	0	0	0	0	0	0	0	0	0	0	0.00487487	0	0	0	0.00614156	0
k__Bacteria|p__Firmicutes|c__Clostridia|o__Lachnospirales|f__Lachnospiraceae|g__[Ruminococcus]_torques_group	0.000575772	0.000690926	0.00107477	0.00080608	0	0	0	0	0	7.67695e-05	0	7.67695e-05	7.67695e-05	0	0	0	0.000230309	0.000230309
k__Bacteria|p__Firmicutes|c__Bacilli|o__Erysipelotrichales|f__Erysipelatoclostridiaceae|g__Erysipelatoclostridium	0.00122831	0.00395363	0.00391525	0.000729311	0.00349301	0.00142024	0	0	0	0.000230309	3.83848e-05	0	0	0.000115154	3.83848e-05	0.000153539	0.000383848	0.000153539
k__Bacteria|p__Firmicutes|c__Clostridia|o__Oscillospirales|f__Ruminococcaceae|g__Ruminococcus	0	7.67695e-05	0.00172731	0	0.00203439	0	0	0	3.83848e-05	7.67695e-05	0	0	0	0.000345463	0.000191924	0.000115154	0.000191924	0.0052971
k__Bacteria|p__Firmicutes|c__Clostridia|o__Lachnospirales|f__Lachnospiraceae|g__Tuzzerella	0	0.000307078	0	0	0	0	0	0	0.000383848	0	7.67695e-05	3.83848e-05	0.000383848	7.67695e-05	7.67695e-05	0.00088285	0.0017657	0.00387686
k__Bacteria|p__Firmicutes|c__Clostridia|o__Oscillospirales|f__Ruminococcaceae|g__Fournierella	0	0	0	0	0	0	0	0	0	0	0	0	0	0.00299401	0.000230309	0.00180408	0.000921234	0.000268693
k__Bacteria|p__Firmicutes|c__Clostridia|o__Oscillospirales|f__Ruminococcaceae|g__Faecalibacterium	0.000998004	0.0017657	0.00168893	0.000191924	0.000729311	0.00111316	0.0012667	0.000230309	0	0.000345463	0.000537387	0.000191924	0.000921234	0.000307078	0.000230309	0.00145862	0.000575772	7.67695e-05
k__Bacteria|p__Firmicutes|c__Bacilli|o__Bacillales|f__Planococcaceae|g__Sporosarcina	0	0	0	0	0	0	0.00145862	0	0	0.000422232	0.000191924	0.0125134	0	0	0	0	0	0
k__Bacteria|p__Firmicutes|c__Clostridia|o__Oscillospirales|f__Ruminococcaceae|g__[Eubacterium]_siraeum_group	0.000115154	0.000729311	0.00291724	0.00468294	0.00591125	0	0	0	0	0	0	0	7.67695e-05	0	0	0.000268693	0	0
k__Bacteria|p__Firmicutes|c__Clostridia|o__Peptostreptococcales-Tissierellales|f__Anaerovoracaceae|g__Anaerovorax	0	0	0	0	0	0	0	0	0.000153539	0	0	0	0	0	0.000345463	0.00364655	0	0.000460617
k__Bacteria|p__Firmicutes|c__Clostridia|o__Oscillospirales|f__Ruminococcaceae|g__UBA1819	0	0	0.000460617	0	0.00118993	0	0	3.83848e-05	0.000153539	0.000575772	0.000268693	7.67695e-05	0.00080608	0.00130508	0.00130508	0.000537387	0.00222632	0.00307078
k__Bacteria|p__Bacteroidota|c__Bacteroidia|o__Bacteroidales|f__Muribaculaceae|g__Muribaculum	0.00291724	0.00188085	0.00230309	0.000652541	0.00218793	0.00272532	0	0	0	0	0	0	0	0.000153539	0	0.000153539	3.83848e-05	7.67695e-05
k__Bacteria|p__uncultured	0.00698603	0.000191924	0.000191924	0.000191924	0.0017657	0.00153539	0	0	0	3.83848e-05	0	3.83848e-05	3.83848e-05	0	0	0	0	3.83848e-05
k__Bacteria|p__Firmicutes|c__Clostridia|o__Lachnospirales|f__Lachnospiraceae|g__[Eubacterium]_ruminantium_group	0	0	0.00115154	0	0.00118993	0	0	0	0	0	0	0	0	0.000690926	0.0012667	0.000690926	0	0.00264855
k__Bacteria|p__Actinobacteriota|c__Coriobacteriia|o__Coriobacteriales|f__Eggerthellaceae|g__Gordonibacter	0.000307078	0.00107477	0.000307078	0.000345463	0.00218793	0.000268693	0.000230309	0.000921234	0.000345463	0.000307078	0.00115154	0	0.00107477	0	0	0	0.000921234	0
k__Bacteria|p__Bacteroidota|c__Bacteroidia|o__Bacteroidales|f__Prevotellaceae|g__Prevotellaceae_UCG-001	0.00383848	0.00157378	0.00080608	0.00138185	0.000307078	0.00257178	0	3.83848e-05	0	0	0	0	0	0	0	0	0	0
k__Bacteria|p__Actinobacteriota|c__Coriobacteriia|o__Coriobacteriales|f__Eggerthellaceae|g__Adlercreutzia	0	0	0	0	0	0	0	0	0	0	0	0	0	0.0012667	0.00165055	0.00111316	0	0.00134347
k__Bacteria|p__Firmicutes|c__Clostridia|o__Peptostreptococcales-Tissierellales|f__Anaerovoracaceae|g__[Eubacterium]_nodatum_group	0	0	0.000422232	0	0.000268693	0	0	0	0	3.83848e-05	0	3.83848e-05	0	0	0.000230309	0.000307078	0.000153539	0
k__Bacteria|p__Firmicutes|c__Clostridia|o__Clostridia_vadinBB60_group|f__Clostridia_vadinBB60_group|g__Clostridia_vadinBB60_group	0.000191924	0.000307078	0	0.00111316	0.000153539	7.67695e-05	0.000230309	0.000422232	0.000422232	0	0.00130508	0.000767695	0	0	0	0.000153539	0.000230309	0.000268693
k__Bacteria|p__Bacteroidota|c__Bacteroidia|o__Bacteroidales|f__Prevotellaceae|g__Prevotella	0.000307078	0.00103639	0.00257178	0.000614156	0	0	0	0.000383848	0	0.000422232	0.000614156	0.000115154	0.000575772	0.000614156	0.000153539	0.000652541	0	0
k__Bacteria|p__Firmicutes|c__Clostridia|o__Lachnospirales|f__Lachnospiraceae|g__GCA-900066575	0	0	0.000115154	0	0.000844465	0	0	0	0.000959619	0.0012667	0.000115154	0.000115154	0	0	0.000115154	0.000307078	0.000537387	0.000230309
k__Bacteria|p__Proteobacteria|c__Alphaproteobacteria|o__Rhodobacterales|f__Rhodobacteraceae|g__Paracoccus	0.000307078	0	0.00088285	0.000383848	0.000690926	0.000230309	0.000460617	0.000191924	0.000460617	0.000191924	0.000191924	3.83848e-05	0.000690926	0	0.000268693	0.000115154	0.000191924	0
k__Bacteria|p__Actinobacteriota|c__Actinobacteria|o__Bifidobacteriales|f__Bifidobacteriaceae|g__Gardnerella	0	0.000537387	0.00234147	0.000307078	0.000115154	0	0	0.000345463	0.000345463	0	0.000767695	0.000422232	0.000575772	0.000422232	0.000575772	0.00080608	0.0012667	0
k__Bacteria|p__Actinobacteriota|c__Actinobacteria|o__Micrococcales|f__Micrococcaceae|g__Pseudarthrobacter	0	0.000844465	0	0.00134347	0.000844465	0.00111316	0.000614156	0.000422232	0.000345463	0.000729311	0.000230309	0.000230309	0.00103639	0.000422232	0	0	0	0
k__Bacteria|p__Firmicutes|c__Bacilli|o__Erysipelotrichales|f__Erysipelotrichaceae|g__ZOR0006	0.00103639	0.000345463	0.00138185	0.000844465	0.00118993	0.00318594	0.000191924	0.000499002	0	0	0	0	0	0	0	0	0	0
k__Bacteria|p__Proteobacteria|c__Alphaproteobacteria|o__Rhodobacterales|f__Rhodobacteraceae|g__Pseudorhodobacter	0.000499002	7.67695e-05	0.00153539	0.00172731	0.000575772	0.00138185	0.00122831	0.00088285	0	0	0	0	0	0	0	0	0	0
k__Bacteria|p__Proteobacteria|c__Alphaproteobacteria|o__Rhizobiales|f__Rhizobiaceae|g__Pseudochrobactrum	0.00111316	0	0.000499002	0.000575772	0.000729311	0.00122831	7.67695e-05	0	0	0.000268693	0	0	0	0	0	7.67695e-05	0	0
k__Bacteria|p__Firmicutes|c__Bacilli|o__Lactobacillales|f__Carnobacteriaceae|g__Atopostipes	0	0	0	0	0	0	0.00118993	0	0	0.000422232	7.67695e-05	0.00545064	0	0	0	0	0	0
k__Bacteria|p__Firmicutes|c__Clostridia|o__Oscillospirales|f__Oscillospiraceae|g__Papillibacter	0	0	0	0	0	0	0	0	0	0	0	0	0.000383848	0.000230309	0.000153539	0.00307078	0.000537387	0.000499002
k__Bacteria|p__Firmicutes|c__Bacilli|o__Bacillales|f__Bacillaceae|g__Bacillus	0	0	0.00180408	0.00149701	0.000153539	0	7.67695e-05	0	0.00107477	0	0.000307078	0.000345463	0.00142024	0	0	0	0	0.000422232
k__Bacteria|p__Proteobacteria|c__Gammaproteobacteria|o__Alteromonadales|f__Alteromonadaceae|g__Alteromonas	0	0	0.000499002	3.83848e-05	0.000998004	0.000153539	0.000268693	0.000230309	7.67695e-05	0.000230309	0.000422232	0	0.000729311	7.67695e-05	0.000537387	7.67695e-05	0	0
k__Bacteria|p__Proteobacteria|c__Gammaproteobacteria|o__Pasteurellales|f__Pasteurellaceae|g__Rodentibacter	0.000690926	0.000153539	0.00130508	0.000115154	0.000959619	0.000844465	7.67695e-05	0.000191924	0.000115154	0.000844465	0.000230309	7.67695e-05	0.000191924	0.000230309	0	0.000383848	0	0
k__Bacteria|p__Actinobacteriota|c__Actinobacteria|o__Micrococcales|f__Micrococcaceae|g__Glutamicibacter	0	0	0	0	0	0	0	0	0	0	0	0	0	0	0	0.000268693	0	0
k__Bacteria|p__Bacteroidota|c__Bacteroidia|o__Bacteroidales|f__Tannerellaceae|g__Macellibacteroides	0.000230309	0.00188085	0.00111316	0.000959619	3.83848e-05	0.00080608	0.000307078	0.000537387	0	0.000153539	0	0.000153539	0	0	0	0	0	0
k__Bacteria|p__Firmicutes|c__Bacilli|o__Bacillales|f__Bacillaceae|g__uncultured	0	0	0.000230309	0.000191924	0	0	0.00153539	0	0	0	0	0.00383848	0	0	0	0	0	0
k__Bacteria|p__Firmicutes|c__Clostridia|o__Oscillospirales|f__Oscillospiraceae|g__UCG-005	0	0.000345463	0.00118993	0	0.000537387	0.000307078	0.000115154	0.000115154	0	0.000460617	0	0	0	0	0	0.000153539	0.000230309	0.000383848
k__Bacteria|p__Firmicutes|c__Negativicutes|o__Veillonellales-Selenomonadales|f__Veillonellaceae|g__Megasphaera	0	0.00115154	0.00172731	0.000614156	3.83848e-05	0	0	0	0	7.67695e-05	0	0	7.67695e-05	0.000115154	3.83848e-05	0.000499002	0.00134347	0
k__Bacteria|p__Actinobacteriota|c__Coriobacteriia|o__Coriobacteriales|f__Atopobiaceae|g__Atopobium	0	0	0.000575772	0.00199601	0.000460617	0	0	0.00103639	0	0	0.000191924	0.000460617	0	0	0.000115154	0.000153539	0.000652541	0
k__Bacteria|p__Firmicutes|c__Bacilli|o__Lactobacillales|f__Leuconostocaceae|g__Leuconostoc	0	0	0	0	0	0	0.00138185	0.000345463	3.83848e-05	0.000690926	0.000383848	0.000268693	0	0	0	7.67695e-05	3.83848e-05	0
k__Bacteria|p__Firmicutes|c__Clostridia|o__Christensenellales|f__Christensenellaceae|g__uncultured	0	3.83848e-05	7.67695e-05	0	0.000307078	0	0.000191924	3.83848e-05	7.67695e-05	0	0.000345463	0.000191924	0	0.000115154	0.000422232	0.000268693	3.83848e-05	0.000115154
k__Bacteria|p__Proteobacteria|c__Alphaproteobacteria|o__Rhodobacterales|f__Rhodobacteraceae|g__uncultured	0	0	3.83848e-05	0.000537387	7.67695e-05	0.000690926	3.83848e-05	0.000268693	0.000268693	0.000230309	0.000230309	0.000115154	0	0	0	0	0.000652541	0.000230309
k__Bacteria|p__Proteobacteria|c__Gammaproteobacteria|o__Pseudomonadales|f__Moraxellaceae|g__Acinetobacter	0	0	0.000115154	0.000191924	0.000383848	0.000307078	0	0	3.83848e-05	0	0.000153539	0	0	0	0	0.000191924	0	0
k__Bacteria|p__Firmicutes|c__Clostridia|o__uncultured|f__uncultured|g__uncultured	0.000153539	0	7.67695e-05	0	0.000422232	0.000153539	0	0	3.83848e-05	0	0	0	0	0	3.83848e-05	0.000537387	3.83848e-05	0.000307078
k__Bacteria|p__Firmicutes|c__Clostridia|o__Clostridiales|f__Clostridiaceae|g__Candidatus_Arthromitus	0	0	0	0	0	0	0.000959619	0.000307078	0	0.000729311	0.000614156	0.00111316	0	0	0	0	0	0
k__Bacteria|p__Proteobacteria|c__Gammaproteobacteria|o__Aeromonadales|f__Aeromonadaceae|g__Aeromonas	0	0	0	0	0	0	0	0	0	0	0	0	0	0	0	0	0	0
k__Bacteria|p__Actinobacteriota|c__Actinobacteria|o__Micrococcales|f__Microbacteriaceae|g__Leucobacter	0	0	0	0	0	0	0.000230309	0.000307078	0	0	0	0	0	0	0	0.000268693	0	0
k__Bacteria|p__Proteobacteria|c__Gammaproteobacteria|o__Oceanospirillales|f__Nitrincolaceae|g__Marinobacterium	0.000345463	0.000230309	0.000652541	0	0	0	0.000191924	0.000422232	0.000153539	7.67695e-05	0	0	0.00138185	0.000268693	0.000115154	0	0	0
k__Bacteria|p__Proteobacteria|c__Gammaproteobacteria|o__Pasteurellales|f__Pasteurellaceae|g__Haemophilus	0	0.000844465	0	0	0	0	0	0	0.000383848	0.000191924	0.000115154	3.83848e-05	0.000690926	0.000191924	0.00080608	0.000115154	0.000422232	0.000230309
k__Bacteria|p__Proteobacteria|c__Gammaproteobacteria|o__Burkholderiales|f__SC-I-84|g__SC-I-84	0.000191924	0.000537387	0.000191924	0	0.000345463	0.000652541	3.83848e-05	0	0.000191924	0.000383848	0.000115154	7.67695e-05	0.000345463	0	0.000153539	0	0.000268693	0.000191924
k__Bacteria|p__Firmicutes|c__Bacilli|o__Bacillales|f__Planococcaceae|g__Chryseomicrobium	0	0.000652541	0	0	0	0.000191924	7.67695e-05	0.000153539	0	0	0	0	0	0	0.000307078	0.000230309	0.000499002	0.000268693
k__Bacteria|p__Cyanobacteria|c__Cyanobacteriia|o__Synechococcales|f__Cyanobiaceae|g__Cyanobium_PCC-6307	0	0.000115154	0	0	0	0	0.000230309	0	0	0.000614156	0.000268693	3.83848e-05	0.000422232	0.000345463	0.000153539	7.67695e-05	0.000191924	0.000115154
k__Bacteria|p__Firmicutes|c__Bacilli|o__Erysipelotrichales|f__Erysipelatoclostridiaceae|g__uncultured	0.000575772	0.00134347	0.000422232	0.000921234	0.000537387	0.000307078	0	0	0	0	0	0	0	0	0	0	0	0
k__Bacteria|p__Firmicutes|c__Bacilli|o__Bacillales|f__Planococcaceae|g__Domibacillus	0	0	0	0	0.000307078	0	0	0	0	0.000191924	0	0	0	0.000729311	0	0.000652541	0.000767695	0.000191924
k__Bacteria|p__Proteobacteria|c__Gammaproteobacteria|o__Burkholderiales|f__Comamonadaceae|g__uncultured	3.83848e-05	3.83848e-05	0.000422232	7.67695e-05	0.000230309	0.000268693	7.67695e-05	0.000153539	0	0.000268693	0	0.000115154	0	0	0	0	0.000307078	0
k__Bacteria|p__Firmicutes|c__Clostridia|o__Oscillospirales|f__Ruminococcaceae|g__Negativibacillus	0	0	0	0	0	0	0	0	0.000307078	0	0.000268693	0	0	0	0	0.000115154	0	0.000153539
k__Bacteria|p__Firmicutes|c__Clostridia|o__Peptococcales|f__Peptococcaceae|g__Peptococcus	0	0	3.83848e-05	0	0	0	0	0	0.000230309	0	0	0	3.83848e-05	0	0	7.67695e-05	0.000153539	0.000383848
k__Bacteria|p__Firmicutes|c__Bacilli|o__Lactobacillales|f__Vagococcaceae|g__Vagococcus	0.000383848	0	0	0.00107477	0.000460617	0.00157378	0.000153539	0	0	0	0	0	0	0	0	0	0	0
k__Bacteria|p__Proteobacteria|c__Gammaproteobacteria|o__Vibrionales|f__Vibrionaceae|g__Vibrio	0	0	0.000268693	0	0	0	3.83848e-05	3.83848e-05	0	3.83848e-05	7.67695e-05	0	0.000422232	0.000191924	0	0.000191924	0	0
k__Bacteria|p__Acidobacteriota|c__Acidobacteriae|o__Acidobacteriales|f__uncultured|g__uncultured	0	0.000307078	0	0	0.000614156	0	0	0	0	0.000307078	0.000230309	0	0	0.000153539	3.83848e-05	0.000230309	0.000268693	0.000191924
Unassigned|p__uncultured	0	0	0	0.00314755	0	0	0.000230309	0	0	3.83848e-05	0	0	0	0	0	0	0	0
k__Bacteria|p__Proteobacteria|c__Gammaproteobacteria|o__Oceanospirillales|f__Alcanivoracaceae1|g__Alcanivorax	0	0	0	0.000115154	0	0.000345463	7.67695e-05	0.000115154	3.83848e-05	0	0	0	0	0	0	0	0	0
k__Bacteria|p__Proteobacteria|c__Gammaproteobacteria|o__Oceanospirillales|f__Saccharospirillaceae|g__Oleibacter	0	0	0	0	0	0.000690926	0	0	3.83848e-05	0	0	0	0	0	0.000230309	0.000998004	0.00138185	0
k__Bacteria|p__Bacteroidota|c__Bacteroidia|o__Bacteroidales|f__Prevotellaceae|g__Paraprevotella	0.000115154	7.67695e-05	0.000537387	0.000268693	0.00115154	0.000230309	0	0	0	0	0	0	0.000268693	0	0	0	0.000191924	0.000115154
k__Bacteria|p__Firmicutes|c__Bacilli|o__Exiguobacterales|f__Exiguobacteraceae|g__Exiguobacterium	0	0	0.000767695	0.000499002	0	0.000153539	0	0	0	3.83848e-05	0	0	0	0	0	0	3.83848e-05	0
k__Bacteria|p__Firmicutes|c__Bacilli|o__Erysipelotrichales|f__Erysipelotrichaceae|g__Erysipelothrix	0	0	0	7.67695e-05	0.000383848	3.83848e-05	0	0.000115154	0	0.000345463	0	0	0	0	0	0	0	0
k__Bacteria|p__Firmicutes|c__Negativicutes|o__Veillonellales-Selenomonadales|f__Veillonellaceae|g__Dialister	0	0.00272532	0.000153539	0	0	0	0	3.83848e-05	0	0	0	0	0	0	0	3.83848e-05	0	0
k__Bacteria|p__Proteobacteria|c__Gammaproteobacteria|o__Alteromonadales|f__Pseudoalteromonadaceae|g__Pseudoalteromonas	0	0	0.00157378	0.000191924	0.000115154	0	0	0	0	0	7.67695e-05	0	0	0	0	0	0	0
k__Bacteria|p__Acidobacteriota|c__Blastocatellia|o__Pyrinomonadales|f__Pyrinomonadaceae|g__RB41	0.000307078	0.000460617	0	0	0	0	3.83848e-05	0	0	0.000153539	0	0	0.000499002	0	0	0	3.83848e-05	0
k__Bacteria|p__Firmicutes|c__Bacilli|o__Bacillales|f__Bacillaceae|g__Fictibacillus	0	0.000422232	0	0.000191924	0.000575772	0.00088285	0	0	0.000115154	0	0.000115154	7.67695e-05	0.000307078	0	0	0	0	0
k__Bacteria|p__Fusobacteriota|c__Fusobacteriia|o__Fusobacteriales|f__Leptotrichiaceae|g__Sneathia	0	0	0.00237986	0.000422232	0	0	0	7.67695e-05	0	0	3.83848e-05	0	0	0	0	0	0	0
k__Bacteria|p__Proteobacteria|c__Alphaproteobacteria|o__Rhodobacterales|f__Rhodobacteraceae|g__Nautella	0	0	0	0.000307078	0.000614156	0	0.000268693	0.000460617	7.67695e-05	0.000230309	0	0	0.000191924	0	0	0.000230309	0.000191924	0
k__Bacteria|p__Firmicutes|c__Clostridia|o__Peptostreptococcales-Tissierellales|f__Peptostreptococcaceae|g__uncultured	0.0022647	0	0	0	0	0	0	0	0	0	0	0	0	7.67695e-05	0	0	7.67695e-05	0.000230309
k__Bacteria|p__Proteobacteria|c__Gammaproteobacteria|o__Burkholderiales|f__Oxalobacteraceae|g__Massilia	7.67695e-05	0	0	0.000422232	0.000230309	0	3.83848e-05	0.000115154	0	0.000345463	0	0	3.83848e-05	0	0	0.000191924	0.000230309	0.000268693
k__Bacteria|p__Bacteroidota|c__Bacteroidia|o__Flavobacteriales|f__Flavobacteriaceae|g__uncultured	0	0	0.000115154	0.000230309	0.000115154	0	0	0	0	0	0	0	0.000115154	0	0	0.000153539	0.000998004	3.83848e-05
k__Bacteria|p__Firmicutes|c__Clostridia|o__Lachnospirales|f__Lachnospiraceae|g__Acetatifactor	0	0	0	0.000844465	0.000191924	0	0	0	0	0	0	0	0	0	0	0.000115154	0	7.67695e-05
k__Bacteria|p__Firmicutes|c__Clostridia|o__Lachnospirales|f__Defluviitaleaceae|g__Defluviitaleaceae_UCG-011	0	0	0.000153539	0	7.67695e-05	0	0	0	0	0	0	0	0	0.000115154	0.000230309	0.000115154	0.000230309	0.000191924
k__Bacteria|p__Proteobacteria|c__Gammaproteobacteria|o__Enterobacterales|f__Enterobacteriaceae|g__Enterobacter	7.67695e-05	0	0	0	0	0	0	0	0	0	0	0	0	0	0.000268693	0	0	0
k__Bacteria|p__Firmicutes|c__Bacilli|o__Lactobacillales|f__Aerococcaceae|g__Facklamia	0	0	0	0	0	0	0.000767695	0	0	3.83848e-05	0	0.000230309	0	0	3.83848e-05	0	0	3.83848e-05
k__Bacteria|p__Proteobacteria|c__Gammaproteobacteria|o__Xanthomonadales|f__Xanthomonadaceae|g__uncultured	0	3.83848e-05	0.000230309	0	0.000307078	0	0	0.000191924	0	0.000460617	0.000383848	0	0	0	0	0	0	0
k__Bacteria|p__Gemmatimonadota|c__Gemmatimonadetes|o__Gemmatimonadales|f__Gemmatimonadaceae|g__uncultured	0.000153539	3.83848e-05	0.000153539	0.000153539	3.83848e-05	0	0.000153539	0.000153539	0	0	0	0	0.000191924	0	3.83848e-05	7.67695e-05	0	0.000230309
k__Bacteria|p__Firmicutes|c__Clostridia|o__Oscillospirales|f__Oscillospiraceae|g__Intestinimonas	0	0	0	0	0	0	0.000191924	0	0	0	0	0	0	0	0	0.000959619	0	0.000153539
k__Bacteria|p__Firmicutes|c__Clostridia|o__Oscillospirales|f__Oscillospiraceae|g__UCG-003	0	0	0	0	0	0	0	0	0	0	0	0	0	0	0	0.000230309	0	0.000460617
k__Bacteria|p__Firmicutes|c__Bacilli|o__Bacillales|f__Planococcaceae|g__Lysinibacillus	0.000652541	0	0.000921234	0	0.000422232	0	0.000230309	0	0	0	0	0	0	0	0	0	0	0
k__Bacteria|p__Gemmatimonadota|c__Gemmatimonadetes|o__Gemmatimonadales|f__Gemmatimonadaceae|g__Gemmatimonas	0.000115154	0	0.000422232	0	0.000268693	0.000268693	7.67695e-05	0.000115154	0	0.000499002	0.000230309	3.83848e-05	0	0	0	0	0	0
k__Bacteria|p__Firmicutes|c__Clostridia|o__Oscillospirales|f__Ruminococcaceae|g__Anaerofilum	0	0	0	0	0	0	0	0	0	0	0	0	0	0.000115154	0.000153539	0.000153539	0	0.000268693
k__Bacteria|p__Firmicutes|c__Negativicutes|o__Veillonellales-Selenomonadales|f__Veillonellaceae|g__Veillonella	0	0	0	0	0	0	0	0	0	0.000268693	3.83848e-05	0.000153539	0.000115154	0.000153539	0	0	0	0
k__Bacteria|p__Firmicutes|c__Bacilli|o__Erysipelotrichales|f__Erysipelotrichaceae|g__[Clostridium]_innocuum_group	0	0	0	0	0.000383848	0.000307078	3.83848e-05	0.000345463	0.000191924	0.000191924	0.000230309	0.000115154	0.000307078	0	0	0	0	0
k__Bacteria|p__Firmicutes|c__Bacilli|o__Erysipelotrichales|f__Erysipelotrichaceae|g__Ileibacterium	0	0	0	0	0	0	0	0	0	0	0	0	0	0	0	0	0	0
k__Bacteria|p__Proteobacteria|c__Gammaproteobacteria|o__Alteromonadales|f__Marinobacteraceae|g__Marinobacter	0	0	0	0	0	0.000115154	3.83848e-05	0.000115154	0.000345463	0.000268693	3.83848e-05	0	0	0	0	0	0	0
k__Bacteria|p__Proteobacteria|c__Alphaproteobacteria|o__Rhizobiales|f__Beijerinckiaceae|g__Bosea	0.000307078	0	0.000652541	0	0.000537387	0.000230309	0.000115154	0.000230309	0	0	0	0	0	0	0	0	0	0
k__Bacteria|p__Firmicutes|c__Clostridia|o__Oscillospirales|f__[Clostridium]_methylpentosum_group|g__[Clostridium]_methylpentosum_group	7.67695e-05	0.000345463	0.000422232	0.000422232	0.000767695	0	0	0	0	0	0	0	0	0	0	0	0	0
k__Bacteria|p__Acidobacteriota|c__Vicinamibacteria|o__Vicinamibacterales|f__Vicinamibacteraceae|g__Vicinamibacteraceae	0	0	0	0	0.000230309	0	0.000230309	0	0	0	0	0.000153539	0	0	0	0	0.000153539	0.000268693
k__Bacteria|p__Firmicutes|c__Clostridia|o__Oscillospirales|f__Ruminococcaceae|g__Pygmaiobacter	0	0	0	0	0	0	0	0	0	0	0	0	0	0	0	0.000383848	0.000153539	0
k__Bacteria|p__Actinobacteriota|c__Coriobacteriia|o__Coriobacteriales|f__uncultured	0	0	0	0	0	0	0	0	0	0	0	0	0	0.000268693	0.000460617	0.000230309	0	0.000537387
k__Bacteria|p__Proteobacteria|c__Alphaproteobacteria|o__Reyranellales|f__Reyranellaceae|g__Reyranella	0	0	0.000383848	0.000422232	0.000307078	0.000460617	3.83848e-05	0.000268693	0	0	0	0	0	0	0	0	0	0
k__Bacteria|p__Proteobacteria|c__Gammaproteobacteria|o__Xanthomonadales|f__Xanthomonadaceae|g__Lysobacter	0.000115154	0	0	0.000307078	0.000153539	0.000460617	0	0	0	0	0	0	0	0	0	7.67695e-05	0	0
k__Bacteria|p__Proteobacteria|c__Gammaproteobacteria|o__Burkholderiales|f__Nitrosomonadaceae|g__MND1	0	0	0.000230309	0	0.000191924	0	0.000153539	0.000230309	0	7.67695e-05	0	0	0.000307078	0.000115154	0	0	0	0
k__Bacteria|p__Proteobacteria|c__Gammaproteobacteria|o__Cellvibrionales|f__Spongiibacteraceae|g__Dasania	0	0	0	0	0	0	0	0	0	0	0	0.000153539	0.00130508	0.000230309	0	0	0	0
k__Bacteria|p__Proteobacteria|c__Gammaproteobacteria|o__Vibrionales|f__Vibrionaceae|g__Salinivibrio	0	0	0	0	0	0	0	0	0	0	0	0	0	0	0	0	0	0
k__Bacteria|p__Proteobacteria|c__Alphaproteobacteria|o__Sphingomonadales|f__Sphingomonadaceae|g__uncultured	0	0	0	0.000537387	0	3.83848e-05	0	0	0	0	0	0	0	0	0	0	0	0
k__Bacteria|p__Spirochaetota|c__Spirochaetia|o__Spirochaetales|f__Spirochaetaceae|g__uncultured	0	0	0	0	0	0	0	0.000191924	0.000230309	0.000191924	0.000153539	7.67695e-05	0.000383848	0	0	0	0	0
k__Bacteria|p__Actinobacteriota|c__Actinobacteria|o__Micrococcales|f__Micrococcaceae|g__uncultured	0	0	0.00115154	0	0	0	0	0	0	0	0	0.000191924	0	0	0	0	0	0
k__Bacteria|p__Firmicutes|c__Bacilli|o__Acholeplasmatales|f__Acholeplasmataceae|g__Anaeroplasma	3.83848e-05	0	0	0	0	0	0	0	0	0	0	0	0	0	0	0.000652541	0.000268693	0
k__Bacteria|p__Bacteroidota|c__Bacteroidia|o__Bacteroidales|f__Porphyromonadaceae|g__Porphyromonas	0	0	0	0	0	0	0	0	0.000153539	7.67695e-05	0	0	0.000998004	0	0	0	0.000191924	3.83848e-05
k__Bacteria|p__Firmicutes|c__Clostridia|o__Clostridia|f__Hungateiclostridiaceae|g__Ruminiclostridium	0	0	0	0	0	0	0	0	0	0	0.000115154	0	0	0.000268693	0	0	0	0.000268693
k__Bacteria|p__Firmicutes|c__Bacilli|o__Lactobacillales|f__Carnobacteriaceae|g__Jeotgalibaca	0	0	0	0	0	0	0	0	0	0	0	0	0	0	0	0	0	0
k__Bacteria|p__Proteobacteria|c__Alphaproteobacteria|o__Sphingomonadales|f__Sphingomonadaceae|g__Sphingobium	0	0	0	0	0	0	0	0	0	0.000115154	0	7.67695e-05	0	0	0	0	0	0
k__Bacteria|p__Firmicutes|c__Clostridia|o__Oscillospirales|f__Ruminococcaceae|g__Caproiciproducens	0	0	0	0	0	0	0.000115154	0	0	0	0	0	0	0	0	0.000153539	0	7.67695e-05
k__Bacteria|p__Spirochaetota|c__Spirochaetia|o__Spirochaetales|f__Spirochaetaceae|g__Treponema	0	0	0	0	0.000153539	0	0	0	0.000153539	0.000230309	0.000268693	7.67695e-05	0	0	0	0	0	0
k__Bacteria|p__Actinobacteriota|c__Actinobacteria|o__Frankiales|f__Sporichthyaceae|g__hgcI_clade	0	0	0	0	0	0	0	0	0	0	0	0	0	0.000307078	0.000191924	0.000191924	0.000230309	0.000268693
k__Bacteria|p__Fusobacteriota|c__Fusobacteriia|o__Fusobacteriales|f__Fusobacteriaceae|g__Cetobacterium	0.000230309	0.000230309	0.000268693	0	7.67695e-05	0	0	0.000307078	0	0	0	0	0	0	0	0	0	0
k__Bacteria|p__Proteobacteria|c__Alphaproteobacteria|o__Rhodobacterales|f__Rhodobacteraceae|g__Sulfitobacter	0	0	0	0.000383848	0	0	7.67695e-05	0.000191924	0	0	0	0	0	0	0	0	0	0
k__Bacteria|p__Actinobacteriota|c__Actinobacteria|o__Micrococcales|f__Micrococcaceae|g__Kocuria	0	0	0	0	0	0	0	0	0	0	0	0.000115154	0	0	0	0	0	0
k__Bacteria|p__Chloroflexi|c__AD3|o__AD3|f__AD3|g__AD3	0	0	0.000690926	0	0	3.83848e-05	0	7.67695e-05	0	0	0	0	0	0.000153539	0	0	0	0.000268693
k__Bacteria|p__Proteobacteria|c__Gammaproteobacteria|o__Xanthomonadales|f__Xanthomonadaceae|g__Arenimonas	0	0	0.000230309	0	0	0	0	0	0.000230309	0.000115154	0	0	0.000268693	0	0	0	0	0
k__Bacteria|p__Bacteroidota|c__Bacteroidia|o__Bacteroidales|f__Dysgonomonadaceae|g__Petrimonas	0	0	0	0	0	0	0	0	0	0	0	0	0	0	0	0	0	0
k__Bacteria|p__Desulfobacterota|c__Desulfovibrionia|o__Desulfovibrionales|f__Desulfovibrionaceae|g__Bilophila	0	0	0	0	0	7.67695e-05	0	0.000115154	0.000115154	7.67695e-05	0.000191924	0	0.000652541	0	0	0	0	0
k__Bacteria|p__Firmicutes|c__Clostridia|o__Lachnospirales|f__Lachnospiraceae|g__A2	3.83848e-05	0	0	0	0	0	0	0	0	0	0	0	0	0	0	0	0	0
k__Bacteria|p__Proteobacteria|c__Gammaproteobacteria|o__Oceanospirillales|f__Halomonadaceae|g__Cobetia	0	0	0	0	7.67695e-05	0	0	7.67695e-05	0	0	0	0	0.000153539	7.67695e-05	0	3.83848e-05	0	0
k__Bacteria|p__Actinobacteriota|c__RBG-16-55-12|o__RBG-16-55-12|f__RBG-16-55-12|g__RBG-16-55-12	0.000614156	7.67695e-05	0.000307078	3.83848e-05	0	0	0.000230309	0	0	0	0	0	0	0	0	0	0	0
k__Bacteria|p__Firmicutes|c__Clostridia|o__Oscillospirales|f__Ruminococcaceae|g__Harryflintia	0	0.000230309	3.83848e-05	3.83848e-05	0.000268693	0	0	0	0.000153539	0.000115154	0	0.000153539	0	0	0	0	0	0
k__Bacteria|p__Proteobacteria|c__Alphaproteobacteria|o__Rhizobiales|f__Rhizobiaceae|g__uncultured	0	0	0	0	0	0	0.000537387	0.000191924	0	0.000115154	0.000191924	0	0	0	0	0	0	0
k__Bacteria|p__Proteobacteria|c__Gammaproteobacteria|o__Xanthomonadales|f__uncultured	0	0	0	0	0	0	0	0	0	0.000230309	0.000191924	0.000115154	0	0	0	0	0	0
k__Bacteria|p__Firmicutes|c__Clostridia|o__Oscillospirales|f__Oscillospiraceae|g__UCG-007	0	0	0	0	0	0	0	0	0	0	0	0	0	0.000307078	0	0.000345463	0	0.000115154
k__Bacteria|p__Proteobacteria|c__Alphaproteobacteria|o__Caulobacterales|f__Caulobacteraceae|g__Brevundimonas	0	0	0.000422232	0	0	0	0	0.000191924	0	0	0	0	0	0	0	0	0	0
k__Bacteria|p__Proteobacteria|c__Alphaproteobacteria|o__Rhodobacterales|f__Rhodobacteraceae|g__Aestuariicoccus	0.000268693	0	0	0	0	0	0	0	0	0.000268693	0.000115154	0	0	0	0	0	0	0
k__Bacteria|p__Firmicutes|c__Clostridia|o__Oscillospirales|f__uncultured	0	0	0	0.000115154	0.000422232	0	0	0	0	0	0	0.000230309	0	0	0	7.67695e-05	7.67695e-05	0.000153539
k__Bacteria|p__Proteobacteria|c__Alphaproteobacteria|o__Rhodobacterales|f__Rhodobacteraceae|g__HIMB11	0	0	0	0	0	0	0	0	0	0	0	0	0.000614156	0.000268693	0	0	0	0
k__Bacteria|p__Proteobacteria|c__Alphaproteobacteria|o__Rhizobiales|f__Rhizobiales_Incertae_Sedis|g__uncultured	0	0	0	0.000153539	7.67695e-05	0.000268693	0.000422232	0.000230309	0	0	0	0	0	0	0	0	0	0
k__Bacteria|p__Bacteroidota|c__Bacteroidia|o__Bacteroidales|f__uncultured	0	0	0.000153539	0.000115154	0.000230309	0	3.83848e-05	0	0	0	7.67695e-05	0	0	0	0	7.67695e-05	3.83848e-05	0
k__Bacteria|p__Bacteroidota|c__Bacteroidia|o__Bacteroidales|f__Williamwhitmaniaceae|g__Acetobacteroides	0	0	0	0	0	3.83848e-05	0	0	0	0.00107477	0	0	0	0	0	0	0	0
k__Bacteria|p__Firmicutes|c__Bacilli|o__Bacillales|f__Planococcaceae|g__uncultured	0	0	0	0.000153539	3.83848e-05	0	0	0	0	0	0	0	0	0	0	0	0	0
k__Bacteria|p__Proteobacteria|c__Alphaproteobacteria|o__Rhizobiales|f__Beijerinckiaceae|g__Methylobacterium-Methylorubrum	0	0.000191924	0.000614156	0.000191924	0	0	0.000115154	0	0	0	0	0	0	0	0	0	0	0
k__Bacteria|p__Proteobacteria|c__Gammaproteobacteria|o__Alteromonadales|f__Alteromonadaceae|g__Salinimonas	0	0	0.000345463	0.000191924	0.000422232	0	0	0	0	0	0	0	0	0	0	0	0	0
k__Bacteria|p__Proteobacteria|c__Gammaproteobacteria|o__Burkholderiales|f__Comamonadaceae|g__Comamonas	0	0	0	0	0	0	0	0	0	0	0	0	0	0	0	0	0	0
k__Bacteria|p__Acidobacteriota|c__Acidobacteriae|o__Subgroup_2|f__Subgroup_2|g__Subgroup_2	0	0	0.000460617	0	0	0.000383848	3.83848e-05	0.000153539	0	0	0	0	0	0	0	0	0	0
k__Bacteria|p__Firmicutes|c__Clostridia|o__Peptostreptococcales-Tissierellales|f__Peptostreptococcales-Tissierellales|g__Tissierella	0.000998004	0	0	0	0	0	0	3.83848e-05	0	0	0	0	0	0	0	0	0	0
k__Bacteria|p__Proteobacteria|c__Alphaproteobacteria|o__Acetobacterales|f__Acetobacteraceae|g__Roseomonas	0	0	0	0	0	0.000575772	0.000268693	0.000191924	0	0	0	0	0	0	0	0	0	0
k__Bacteria|p__Proteobacteria|c__Alphaproteobacteria|o__Rhodospirillales|f__uncultured|g__uncultured	0	0.000153539	0	0.000115154	0	3.83848e-05	0	0	0	0	7.67695e-05	0	0	0.000153539	0	0	0	0
k__Bacteria|p__Proteobacteria|c__Gammaproteobacteria|o__Burkholderiales|f__Comamonadaceae|g__Hydrogenophaga	0.000191924	0.000268693	0.000575772	0	0	0	0	0	0	0	0	0	0	0	0	0	0	0
k__Bacteria|p__Proteobacteria|c__Gammaproteobacteria|o__Cardiobacteriales|f__Wohlfahrtiimonadaceae|g__Koukoulia	0	0	0	0	0.00088285	7.67695e-05	0	0	0	0	7.67695e-05	0	0	0	0	0	0	0
k__Bacteria|p__Proteobacteria|c__Gammaproteobacteria|o__Burkholderiales|f__Alcaligenaceae|g__Advenella	0.000268693	0	0.000499002	0	0	0	0.000230309	0	0	0	0	0	0	0	0	0	0	0
k__Bacteria|p__Proteobacteria|c__Gammaproteobacteria|o__Burkholderiales|f__Comamonadaceae|g__Limnohabitans	0	0	0	0	0	0	0	0	0	0	0	0	0	0	0	0	0	0
k__Bacteria|p__Proteobacteria|c__Gammaproteobacteria|o__Cellvibrionales|f__Cellvibrionaceae|g__uncultured	0	0	0	0	0	0.000268693	0.000153539	0.000115154	0	0	7.67695e-05	0	0.000345463	3.83848e-05	0	0	0	0
k__Bacteria|p__Firmicutes|c__Negativicutes|o__Acidaminococcales|f__Acidaminococcaceae|g__Phascolarctobacterium	7.67695e-05	0.000230309	0	0	0.000115154	0.000345463	0	0	0	0	0	0	0	0	0	0	0	3.83848e-05
k__Bacteria|p__Proteobacteria|c__Gammaproteobacteria|o__Burkholderiales|f__Burkholderiaceae|g__Burkholderia-Caballeronia-Paraburkholderia	0.000115154	0	0	0	3.83848e-05	0.000115154	0	3.83848e-05	0	3.83848e-05	7.67695e-05	0	0	0.000191924	0	0.000230309	0	0
k__Bacteria|p__Actinobacteriota|c__Coriobacteriia|o__Coriobacteriales|f__Eggerthellaceae|g__uncultured	0	0.000268693	0	0	0	0	0	0.000191924	0	0.000191924	0	0	0	0	0.000153539	0	0	0
k__Bacteria|p__Bacteroidota|c__Bacteroidia|o__Flavobacteriales|f__Flavobacteriaceae|g__Flavobacterium	0	0	0	0	0	0	0	0	0	0.000115154	0	0	0	0	0	0	0	0
k__Bacteria|p__Cyanobacteria|c__Vampirivibrionia|o__Gastranaerophilales|f__Gastranaerophilales|g__Gastranaerophilales	0	0	0	0	0	0	0	0	0	0	0	0	0	0	0	7.67695e-05	0	0
k__Bacteria|p__Proteobacteria|c__Alphaproteobacteria|o__Rhodospirillales|f__Magnetospiraceae|g__uncultured	0.000268693	0	0	0.000153539	0.000345463	0.000115154	0	0	0	0	0	0	0	0	0	0	0	0
k__Bacteria|p__Proteobacteria|c__Gammaproteobacteria|o__Burkholderiales|f__Alcaligenaceae|g__Alcaligenes	0.000383848	0	0	0.000422232	0	3.83848e-05	0	0	0	0	0	0	0	0	0	0	0	0
k__Bacteria|p__Bacteroidota|c__Bacteroidia|o__Chitinophagales|f__Chitinophagaceae|g__Flavisolibacter	0	0	0	3.83848e-05	0.000153539	0	0	0	0	0.000230309	7.67695e-05	7.67695e-05	0	0.000153539	0	0	0	0
k__Bacteria|p__Proteobacteria|c__Alphaproteobacteria|o__Rhizobiales|f__Rhizobiaceae|g__Paenochrobactrum	0	0	0	0	0	0	0.000307078	0.000268693	0	0	0.000268693	0	0	0	0	0	0	0
k__Bacteria|p__Proteobacteria|c__Gammaproteobacteria|o__Burkholderiales|f__Nitrosomonadaceae|g__Ellin6067	0	0	0.000499002	0	0	0.000153539	0	0	0	0	0	3.83848e-05	0	3.83848e-05	0	0	0	0
k__Bacteria|p__Proteobacteria|c__Gammaproteobacteria|o__Cardiobacteriales|f__Wohlfahrtiimonadaceae|g__Wohlfahrtiimonas	0	0	0	0	0	0	0	0	7.67695e-05	0	0	0	0	0	0	0.000767695	0	0
k__Bacteria|p__Proteobacteria|c__Gammaproteobacteria|o__Enterobacterales|f__Morganellaceae|g__Proteus	0	0	0	0	0	0	0	0	0	0	0	0	0.000115154	0	0	0.000268693	0	0
k__Bacteria|p__Actinobacteriota|c__Actinobacteria|o__Micromonosporales|f__Micromonosporaceae|g__uncultured	0	0	0.000729311	0	0	0	0	0	0	0	0	7.67695e-05	0	0	0	0	0	0
k__Bacteria|p__Bacteroidota|c__Bacteroidia|o__Bacteroidales|f__F082|g__F082	0.00080608	0	0	0	0	0	0	0	0	0	0	0	0	0	0	0	0	0
k__Bacteria|p__Chloroflexi|c__Anaerolineae|o__RBG-13-54-9|f__RBG-13-54-9|g__RBG-13-54-9	3.83848e-05	0.000191924	0	0.000115154	0.000115154	0	3.83848e-05	0	0	0	7.67695e-05	0	0.000153539	0	0	0	0	0
k__Bacteria|p__Fusobacteriota|c__Fusobacteriia|o__Fusobacteriales|f__Fusobacteriaceae|g__Fusobacterium	0	0	0	0	0	0.000230309	0	0	0	0	0	0	0.000268693	3.83848e-05	0	0	0	0.000191924
k__Bacteria|p__Actinobacteriota|c__Actinobacteria|o__Micrococcales|f__Microbacteriaceae|g__Microbacterium	0	0.000153539	0	0	0.000614156	0	0	0	0	0	0	0	0	0	0	0	0	0
k__Bacteria|p__Bacteroidota|c__Bacteroidia|o__Sphingobacteriales|f__Sphingobacteriaceae|g__Olivibacter	0	0	0	0	0	0	0	0	0	0	0	0	0	0	0	0	0	0
k__Bacteria|p__Firmicutes|c__Clostridia|o__Lachnospirales|f__Lachnospiraceae|g__Lachnospiraceae_UCG-001	0	0	0.000345463	0	0.000422232	0	0	0	0	0	0	0	0	0	0	0	0	0
k__Bacteria|p__Proteobacteria|c__Gammaproteobacteria|o__Oceanospirillales|f__Oleiphilaceae|g__Oleiphilus	0	0	0	0	0	7.67695e-05	0.000153539	0.000230309	0	0	0	3.83848e-05	0	0	0	0	0	0
k__Bacteria|p__Synergistota|c__Synergistia|o__Synergistales|f__Synergistaceae|g__uncultured	0.000153539	0	0.000422232	0.000191924	0	0	0	0	0	0	0	0	0	0	0	0	0	0
k__Bacteria|p__Actinobacteriota|c__Actinobacteria|o__Micrococcales|f__Microbacteriaceae|g__uncultured	0	0	0	0	0	0	0.000268693	0	0	0	0	0	0	0	0	0	0	0
k__Bacteria|p__Bacteroidota|c__Bacteroidia|o__Chitinophagales|f__Chitinophagaceae|g__uncultured	0	0	0	0.000115154	0	0	0	0	0	0	7.67695e-05	0	0.000307078	0	0	0	0	0
k__Bacteria|p__Proteobacteria|c__Gammaproteobacteria|o__Cardiobacteriales|f__Wohlfahrtiimonadaceae|g__Ignatzschineria	0	0	0	0	0	0	0	0	0	0	0	0	0	0	0	7.67695e-05	0	0.000307078
k__Bacteria|p__Proteobacteria|c__Gammaproteobacteria|o__Enterobacterales|f__uncultured	0	0	0	0	0	0	0	0	0	0	0	0	0	0	0	0	0	0
k__Bacteria|p__Actinobacteriota|c__Actinobacteria|o__Actinomycetales|f__Actinomycetaceae|g__Actinomyces	0	0	0	0	0	0	0	0	0	0	7.67695e-05	0	0	0	0.000191924	0	0	0
k__Bacteria|p__Bacteroidota|c__Bacteroidia|o__Bacteroidales|f__Rikenellaceae|g__uncultured	0	0	0	0	0	0	0	0	0.000115154	0	0.000115154	0	0.000191924	0.000153539	0	0	0	0
k__Bacteria|p__Campilobacterota|c__Campylobacteria|o__Campylobacterales|f__Campylobacteraceae|g__Campylobacter	0	0	0	0	0	0	0	0	0	0.000307078	0	0	0	0	0	7.67695e-05	0	0
k__Bacteria|p__Proteobacteria|c__Gammaproteobacteria|o__Burkholderiales|f__Oxalobacteraceae|g__Herbaspirillum	0	0.000537387	0	0	0	0	7.67695e-05	0	0	0	0	0	0	0	0	0	0	0
k__Bacteria|p__Proteobacteria|c__Gammaproteobacteria|o__Xanthomonadales|f__Rhodanobacteraceae|g__Dyella	0	0	0	0	0	7.67695e-05	0	0	0	0	0	0	0	0	0	0	0	0
k__Bacteria|p__Bacteroidota|c__Bacteroidia|o__Bacteroidales|f__Bacteroidetes_vadinHA17|g__Bacteroidetes_vadinHA17	0	0	0	0	0	0	0	0	0.000268693	0.000153539	0	0.000153539	0	0	0	0	0	0
k__Bacteria|p__Actinobacteriota|c__Acidimicrobiia|o__Microtrichales|f__Ilumatobacteraceae|g__CL500-29_marine_group	0	0	0	0	0	0	0	0	0	0	0	0	0	0	7.67695e-05	0.000153539	0	3.83848e-05
k__Bacteria|p__Firmicutes|c__Bacilli|o__Bacillales|f__Bacillaceae|g__Anoxybacillus	0	0	0	0	0	0	0.000307078	0	0	0	0	0	0	0	0	0	0	0
k__Bacteria|p__Firmicutes|c__Bacilli|o__Bacillales|f__Bacillaceae|g__Pseudogracilibacillus	0	0	0	0	0	0	0	0	0	0	0.000230309	0.000307078	0	0	0	0	0	0
k__Bacteria|p__Proteobacteria|c__Gammaproteobacteria|o__Cardiobacteriales|f__Wohlfahrtiimonadaceae|g__uncultured	3.83848e-05	0	0	0.000460617	0	0	0	0	0	0	0	0	0	0	0	0	0	3.83848e-05
k__Bacteria|p__Proteobacteria|c__Gammaproteobacteria|o__Xanthomonadales|f__Xanthomonadaceae|g__Pseudoxanthomonas	0	0	0	0	0	0	0	0	3.83848e-05	0	0	0	0	0	0	0	0	0
k__Bacteria|p__Proteobacteria|c__Gammaproteobacteria|o__Xanthomonadales|f__Xanthomonadaceae|g__SN8	0	0	0	0	0	0	0	0	0	0	0	0	0	0	0	0	0	0
k__Bacteria|p__Bacteroidota|c__Bacteroidia|o__Bacteroidales|f__Prevotellaceae|g__Prevotellaceae_UCG-003	0	7.67695e-05	0	0	7.67695e-05	0	0	0	0	0	0	0	0	0	0	3.83848e-05	3.83848e-05	0.000230309
k__Bacteria|p__Bacteroidota|c__Bacteroidia|o__Flavobacteriales|f__Flavobacteriaceae|g__Aequorivita	0	0	0	0	0	0	0	0	0	0	0	0	0	0	0	0	0	0
k__Bacteria|p__Bacteroidota|c__Bacteroidia|o__Sphingobacteriales|f__Sphingobacteriaceae|g__uncultured	0	0	0	0	0	0	0	3.83848e-05	0.000230309	0.000191924	0	0	0	0	0	0	0	0
k__Bacteria|p__Firmicutes|c__Bacilli|o__Lactobacillales|f__uncultured	7.67695e-05	0	3.83848e-05	0	0	0	3.83848e-05	3.83848e-05	0	0	0	0	0	0	3.83848e-05	3.83848e-05	7.67695e-05	0
k__Bacteria|p__Firmicutes|c__Clostridia|o__Eubacteriales|f__Anaerofustaceae|g__Anaerofustis	0	0	0	0	0	0	0	0	0	0	0	0	0	0	0	0	0	3.83848e-05
k__Bacteria|p__Firmicutes|c__Clostridia|o__Oscillospirales|f__Butyricicoccaceae|g__Butyricicoccus	0	0	0	0	0	0.000115154	0	0.000115154	0	0.000115154	0	0	0	0.000115154	0	0	0	0
k__Bacteria|p__Firmicutes|c__Clostridia|o__Oscillospirales|f__Ruminococcaceae|g__Paludicola	0	0	0	0.000383848	0	0	0	0	0	0	0	0	0	0	0	0	0	0
k__Bacteria|p__Proteobacteria|c__Gammaproteobacteria|o__Alteromonadales|f__Alteromonadaceae|g__Alishewanella	0	0	0	0	0	0	0	0	0	0	0	0	0	0	0	0	0	0
k__Bacteria|p__Bacteroidota|c__Kapabacteria|o__Kapabacteriales|f__Kapabacteriales|g__Kapabacteriales	0	0	0	0	0	0	0	0	0	0	0	0	0.000383848	7.67695e-05	0	0	0	0
k__Bacteria|p__Desulfobacterota|c__Desulfuromonadia|o__Geobacterales|f__Geobacteraceae|g__Citrifermentans	0	0	0	0	0	0	0	0	0	0	0	0	0	0	0	0	0	0
k__Bacteria|p__Firmicutes|c__Bacilli|o__Bacillales|f__Planococcaceae|g__Solibacillus	0	0.000153539	0	0	0	0.000307078	0	0	0	0	0	0	0	0	0	0	0	0
k__Bacteria|p__Firmicutes|c__Clostridia|o__Lachnospirales|f__Lachnospiraceae|g__Marvinbryantia	0	0	0	0	0	0	0.000115154	0	0	0	0	0	0	0	0	0	0	0.000115154
k__Bacteria|p__Fusobacteriota|c__Fusobacteriia|o__Fusobacteriales|f__Leptotrichiaceae|g__Leptotrichia	0	0	0	0	0	0	0	0	0	0	0	0	0	0	7.67695e-05	0	0	0
k__Bacteria|p__Proteobacteria|c__Alphaproteobacteria|o__Rhizobiales|f__Xanthobacteraceae|g__uncultured	0	0	0.000230309	0	0	0	0	0	0	0	0	0	0.000230309	0	0	0	0	0
k__Bacteria|p__Proteobacteria|c__Gammaproteobacteria|o__Gammaproteobacteria_Incertae_Sedis|f__Unknown_Family|g__Acidibacter	0	0	3.83848e-05	0	0	0	0	0	0	0	0	0	0.000191924	7.67695e-05	0	0	0	7.67695e-05
k__Bacteria|p__Actinobacteriota|c__Actinobacteria|o__Frankiales|f__Sporichthyaceae|g__Sporichthyaceae	0	0	0	0	0	0	0	0	0	0	0	0	0	0	0	0	3.83848e-05	0
k__Bacteria|p__Firmicutes|c__Bacilli|o__Staphylococcales|f__Gemellaceae|g__Gemella	0	0	0	0	0	0	0	0	0	0	0	0	0	0	0	0	0.000230309	0
k__Bacteria|p__Firmicutes|c__Clostridia|o__Christensenellales|f__Christensenellaceae|g__Christensenellaceae	0	7.67695e-05	0	0	0	0.000153539	7.67695e-05	0	0	0	0	0	0	0	0	0	0	0
k__Bacteria|p__Firmicutes|c__Clostridia|o__Lachnospirales|f__Lachnospiraceae|g__[Eubacterium]_ventriosum_group	0	0	0.000422232	0	0	0	0	0	0	0	0	0	0	0	0	0	0	0
k__Bacteria|p__Firmicutes|c__uncultured	7.67695e-05	0	0	7.67695e-05	7.67695e-05	0	0	0	0	0	0	0	7.67695e-05	0	0	0	0	0
k__Bacteria|p__Proteobacteria|c__Alphaproteobacteria|o__Dongiales|f__Dongiaceae|g__Dongia	0.000230309	0.000191924	0	0	0	0	0	0	0	0	0	0	0	0	0	0	0	0
k__Bacteria|p__Proteobacteria|c__Gammaproteobacteria|o__Burkholderiales|f__Rhodocyclaceae|g__Azoarcus	0	0	0	0	0	0	0	0	0	0	0	0	0	0	0	0	0	0
k__Bacteria|p__WPS-2|c__WPS-2|o__WPS-2|f__WPS-2|g__WPS-2	0	0.000191924	0	3.83848e-05	0	3.83848e-05	0	3.83848e-05	3.83848e-05	3.83848e-05	3.83848e-05	0	0	0	0	0	0	0
k__Bacteria|p__Bacteroidota|c__Bacteroidia|o__Bacteroidales|f__Tannerellaceae|g__uncultured	0	0	0.000115154	0	3.83848e-05	0	3.83848e-05	0	0	3.83848e-05	0	0	0.000115154	0	0	0	0	0
k__Bacteria|p__Bacteroidota|c__Bacteroidia|o__uncultured	0	0.000383848	0	0	0	0	0	0	0	0	0	0	0	0	0	0	0	0
k__Bacteria|p__Firmicutes|c__Clostridia|o__Clostridia|f__Hungateiclostridiaceae|g__Fastidiosipila	0	0	0	0.000230309	0	0	0	0	0	0	0	0	0	7.67695e-05	7.67695e-05	0	0	0
k__Bacteria|p__Firmicutes|c__Clostridia|o__Clostridia|f__Hungateiclostridiaceae|g__uncultured	0	0	0	0	0	0	0	0	0	0	0	0	0	0	0	0	3.83848e-05	7.67695e-05
k__Bacteria|p__Firmicutes|c__Clostridia|o__Lachnospirales|f__Lachnospiraceae|g__ASF356	0.000345463	0	0	0	3.83848e-05	0	0	0	0	0	0	0	0	0	0	0	0	0
k__Bacteria|p__Proteobacteria|c__Alphaproteobacteria|o__SAR11_clade|f__Clade_III|g__Clade_III	0	0	0	0	0	0	0	0	0	0	0	0	0	0.000115154	7.67695e-05	0	3.83848e-05	0.000115154
k__Bacteria|p__Proteobacteria|c__Gammaproteobacteria|o__Burkholderiales|f__Alcaligenaceae|g__Oligella	0	0	0	0	0	0	0	0	0	0.000383848	0	0	0	0	0	0	0	0
k__Bacteria|p__Proteobacteria|c__Gammaproteobacteria|o__Burkholderiales|f__Burkholderiaceae|g__Polynucleobacter	0	0	0	0	0	0	0	0	0	0	0	0	0	0	0	0	0	0.000230309
k__Bacteria|p__Proteobacteria|c__Gammaproteobacteria|o__Burkholderiales|f__uncultured	0	0	0	0	0	0.000115154	0	0	0	3.83848e-05	3.83848e-05	0	7.67695e-05	3.83848e-05	0	0	0	0
k__Bacteria|p__Proteobacteria|c__Gammaproteobacteria|o__Enterobacterales|f__Morganellaceae|g__Providencia	0	0	0	0.000268693	0.000115154	0	0	0	0	0	0	0	0	0	0	0	0	0
k__Bacteria|p__Proteobacteria|c__Gammaproteobacteria|o__Oceanospirillales|f__Pseudohongiellaceae|g__Pseudohongiella	0	0	0	0	0	0	0	0	0	0	0	0	0.000153539	0.000153539	7.67695e-05	0	0	0
k__Bacteria|p__Proteobacteria|c__Gammaproteobacteria|o__Pasteurellales|f__Pasteurellaceae|g__Muribacter	0	0	0	0	0	0	0	0	0	0	0	0	0	0	0	0	0	0
k__Bacteria|p__Proteobacteria|c__Gammaproteobacteria|o__Xanthomonadales|f__Xanthomonadaceae|g__Stenotrophomonas	0	0	0.000383848	0	0	0	0	0	0	0	0	0	0	0	0	0	0	0
k__Bacteria|p__Bacteroidota|c__Bacteroidia|o__Bacteroidales|f__Dysgonomonadaceae|g__uncultured	0	0	0	0	0	0	0	0	0	0	0	0	0	0	0	0	0	0
k__Bacteria|p__Bacteroidota|c__Bacteroidia|o__Sphingobacteriales|f__Lentimicrobiaceae|g__Lentimicrobium	0	0	0	0	0	0	0	0	0	0	0	0	0	0	0	0	0	0
k__Bacteria|p__Firmicutes|c__Bacilli|o__Bacillales|f__Bacillaceae|g__Virgibacillus	0	0	0.000345463	0	0	0	0	0	0	0	0	0	0	0	0	0	0	0
k__Bacteria|p__Firmicutes|c__Bacilli|o__Bacillales|f__uncultured	0	0	0.000345463	0	0	0	0	0	0	0	0	0	0	0	0	0	0	0
k__Bacteria|p__MBNT15|c__MBNT15|o__MBNT15|f__MBNT15|g__MBNT15	0	0	0	0.000230309	0	0	0	0	0	0	0	0	0	0	0	0	0	0
k__Bacteria|p__Proteobacteria|c__Alphaproteobacteria|o__Rhodobacterales|f__Rhodobacteraceae|g__Cognatishimia	0	0	0	0	0	0	0	0	0	0	0	0	0.000345463	0	0	0	0	0
k__Bacteria|p__Proteobacteria|c__Alphaproteobacteria|o__Sphingomonadales|f__Sphingomonadaceae|g__Altererythrobacter	0	0.000345463	0	0	0	0	0	0	0	0	0	0	0	0	0	0	0	0
k__Bacteria|p__Proteobacteria|c__Alphaproteobacteria|o__Sphingomonadales|f__Sphingomonadaceae|g__Sphingorhabdus	0	0	0	0	0	0	0	0	0	0	0	0	0	0	0	0	0	0
k__Bacteria|p__Acidobacteriota|c__Vicinamibacteria|o__Vicinamibacterales|f__uncultured|g__uncultured	0	0	0	0	0	0	0	0	0	0	0	0.000307078	0	0	0	0	0	0
k__Bacteria|p__Actinobacteriota|c__Actinobacteria|o__Micrococcales|f__Intrasporangiaceae|g__uncultured	0	0	0	0	0	0	0	0	0	0	0	0	0	0.000307078	0	0	0	0
k__Bacteria|p__Actinobacteriota|c__Actinobacteria|o__Propionibacteriales|f__Nocardioidaceae|g__Nocardioides	0	0	0	0	0	0	0	0	0	0	0	0	0	0.000153539	0	0	0	0
k__Bacteria|p__Bacteroidota|c__Bacteroidia|o__Chitinophagales|f__Saprospiraceae|g__uncultured	0	0	0	0	0	0	0	0	0	0	0	0	0	0	0	0	0	0
k__Bacteria|p__Bacteroidota|c__Bacteroidia|o__Sphingobacteriales|f__Sphingobacteriaceae|g__Sphingobacterium	0	0	0	0	0	0	0	0	0	0	0	0	0	0	0	0	0.000191924	0
k__Bacteria|p__Firmicutes|c__Clostridia|o__Lachnospirales|f__Lachnospiraceae|g__Lachnospiraceae_UCG-004	0	0	0	0	0	0.000153539	0	0	0.000115154	0	0	0	0	0	0	3.83848e-05	0	0
k__Bacteria|p__Firmicutes|c__Clostridia|o__Oscillospirales|f__Ruminococcaceae|g__Subdoligranulum	0	0	0	0	0	0	0	0	0	0	0	0	0	0	0	0	0	0
k__Bacteria|p__Proteobacteria|c__Gammaproteobacteria|o__Alteromonadales|f__Shewanellaceae|g__Shewanella	0	0	0	0	0	0	0	0	0	0	0	0	0	0	0	0	0	0
k__Bacteria|p__Proteobacteria|c__Gammaproteobacteria|o__Cellvibrionales|f__Cellvibrionaceae|g__Cellvibrio	0	0	0	0	0	0	0	0	0	0.000307078	0	0	0	0	0	0	0	0
k__Bacteria|p__Proteobacteria|c__Gammaproteobacteria|o__Enterobacterales|f__Morganellaceae|g__Morganella	0	0	0	0	0.000307078	0	0	0	0	0	0	0	0	0	0	0	0	0
k__Bacteria|p__Proteobacteria|c__Gammaproteobacteria|o__Methylococcales|f__Methylococcaceae|g__uncultured	0	0	0.000307078	0	0	0	0	0	0	0	0	0	0	0	0	0	0	0
k__Bacteria|p__Actinobacteriota|c__Actinobacteria|o__Corynebacteriales|f__Dietziaceae|g__Dietzia	0	0	0	0	0	0	3.83848e-05	3.83848e-05	0	0	0	0	0	0	0	0	0	0
k__Bacteria|p__Actinobacteriota|c__Actinobacteria|o__Micrococcales|f__Micrococcaceae|g__Enteractinococcus	0	0	0	0	0	0	0.000115154	0	0	0	0	0.000153539	0	0	0	0	0	0
k__Bacteria|p__Bacteroidota|c__Bacteroidia|o__Chitinophagales|f__Chitinophagaceae|g__Parasegetibacter	0	0	0	0	0	0	0	0	0	0.000268693	0	0	0	0	0	0	0	0
k__Bacteria|p__Bacteroidota|c__Bacteroidia|o__Flavobacteriales|f__Flavobacteriaceae|g__Myroides	0	0	0	0	0	0	0	0	0	0	0	0	0	0	0	0.000268693	0	0
k__Bacteria|p__Bacteroidota|c__Bacteroidia|o__Flavobacteriales|f__Weeksellaceae|g__Chryseobacterium	0	0	0	0	0	0	0	0	0	0	0	0	0	0	0	0	3.83848e-05	0
k__Bacteria|p__Firmicutes|c__Bacilli|o__Lactobacillales|f__Aerococcaceae|g__Globicatella	0	0	0.000191924	0	7.67695e-05	0	0	0	0	0	0	0	0	0	0	0	0	0
k__Bacteria|p__Firmicutes|c__Clostridia|o__Lachnospirales|f__Lachnospiraceae|g__Coprococcus	0	0	0	0	0	0.000268693	0	0	0	0	0	0	0	0	0	0	0	0
k__Bacteria|p__Firmicutes|c__Clostridia|o__Oscillospirales|f__Ruminococcaceae|g__Candidatus_Soleaferrea	0	0	0	0	0	0	0	0	0	0	0	0	0	0	0	7.67695e-05	0	0
k__Bacteria|p__Firmicutes|c__Incertae_Sedis|o__DTU014|f__DTU014|g__DTU014	0	0	0	0	0	0	0	0	0	0	0	0	0	0	0	0	3.83848e-05	0
k__Bacteria|p__Methylomirabilota|c__Methylomirabilia|o__Rokubacteriales|f__Rokubacteriales|g__Rokubacteriales	0	0	0	0	0	0	0	0	0	0	0	7.67695e-05	0	0	0	0	0	7.67695e-05
k__Bacteria|p__Nitrospirota|c__Nitrospiria|o__Nitrospirales|f__Nitrospiraceae|g__Nitrospira	0	0	0	0	0	0	0	3.83848e-05	3.83848e-05	0	0	7.67695e-05	0.000115154	0	0	0	0	0
k__Bacteria|p__Proteobacteria|c__Alphaproteobacteria|o__Sneathiellales|f__Sneathiellaceae|g__Sneathiella	0	0	0	0	0	0	0	0	0	0.000115154	3.83848e-05	0	0.000115154	0	0	0	0	0
k__Bacteria|p__Proteobacteria|c__Alphaproteobacteria|o__uncultured	0	0.000153539	0.000115154	0	0	0	0	0	0	0	0	0	0	0	0	0	0	0
k__Bacteria|p__Proteobacteria|c__Gammaproteobacteria|o__Burkholderiales|f__Burkholderiaceae|g__Cupriavidus	0	0	0	0	0	0	0	0	0	0	0	0	0	0	0	0	0	0
k__Bacteria|p__Proteobacteria|c__Gammaproteobacteria|o__Burkholderiales|f__Neisseriaceae|g__Alysiella	0	0	0.000268693	0	0	0	0	0	0	0	0	0	0	0	0	0	0	0
k__Bacteria|p__Proteobacteria|c__Gammaproteobacteria|o__Burkholderiales|f__Nitrosomonadaceae|g__mle1-7	0	0	0	0	0	0	0	0	0	0	0	0	3.83848e-05	0	0	0	0	0
k__Bacteria|p__Proteobacteria|c__Gammaproteobacteria|o__Oceanospirillales|f__Saccharospirillaceae|g__uncultured	0	0	0	0	0	0.000115154	0	0	0	0	0	0	0	0	0	0	0	0
k__Bacteria|p__Actinobacteriota|c__Actinobacteria|o__Actinomycetales|f__Actinomycetaceae|g__Mobiluncus	0	0	0	0.000230309	0	0	0	0	0	0	0	0	0	0	0	0	0	0
k__Bacteria|p__Actinobacteriota|c__Actinobacteria|o__Micrococcales|f__Microbacteriaceae|g__Candidatus_Aquiluna	0	0	0	0	0	0	0	0	0	0	0	0	0	0	0	0	0	0.000230309
k__Bacteria|p__Bacteroidota|c__Bacteroidia|o__Bacteroidales|f__Prolixibacteraceae|g__uncultured	0.000153539	0	0	0	0	0	0	0	7.67695e-05	0	0	0	0	0	0	0	0	0
k__Bacteria|p__Bacteroidota|c__Bacteroidia|o__Bacteroidales|f__Rs-E47_termite_group|g__Rs-E47_termite_group	0	0.000230309	0	0	0	0	0	0	0	0	0	0	0	0	0	0	0	0
k__Bacteria|p__Desulfobacterota|c__Desulfovibrionia|o__Desulfovibrionales|f__Desulfomicrobiaceae|g__Desulfomicrobium	0	0	0	0	0	0	0	0	0	0	0	0	0	0	0	0	0	0
k__Bacteria|p__Firmicutes|c__Limnochordia|o__Limnochordia|f__Limnochordia|g__Hydrogenispora	0	0	0	0	0	0	0	0	0	0	0	0	0	0	0	0	0	0
k__Bacteria|p__Patescibacteria|c__Saccharimonadia|o__Saccharimonadales|f__Saccharimonadaceae|g__TM7x	0	0	0	0	0	0	0	0	0	0	0	0	0	0	0	0	0	0
k__Bacteria|p__Proteobacteria|c__Alphaproteobacteria|o__SAR11_clade|f__Clade_I|g__Clade_Ia	0	0	0	0	0	0	0	0	0	0	0	0	0.000230309	0	0	0	0	0
k__Bacteria|p__Proteobacteria|c__Gammaproteobacteria|o__Alteromonadales|f__Alteromonadaceae|g__uncultured	0	0	0	0	0	0	0	3.83848e-05	0	0	0	0	0	0	0	0	0	0
k__Bacteria|p__Proteobacteria|c__Gammaproteobacteria|o__Alteromonadales|f__Colwelliaceae|g__Thalassotalea	0	0	0	0	0	0	0	0	0	7.67695e-05	0	0	0.000153539	0	0	0	0	0
k__Bacteria|p__Proteobacteria|c__Gammaproteobacteria|o__Burkholderiales|f__Alcaligenaceae|g__Paenalcaligenes	0	0	0	0	0	0	0	3.83848e-05	0	0	0	0	0	0	0	0	0	0
k__Bacteria|p__Proteobacteria|c__Gammaproteobacteria|o__Burkholderiales|f__Comamonadaceae|g__Pelomonas	0	0	0	0	0	0	7.67695e-05	0	0	0	0	0	0	0	0	0	0	0
k__Bacteria|p__Proteobacteria|c__Gammaproteobacteria|o__Nitrosococcales|f__Nitrosococcaceae|g__CI75cm.2.12	0	0	0	0	0	0	0	0	0	0.000230309	0	0	0	0	0	0	0	0
k__Bacteria|p__Proteobacteria|c__Gammaproteobacteria|o__Xanthomonadales|f__Xanthomonadaceae|g__Luteimonas	0	0	0	0	0	0	0	0	0	0	0	0	0	0.000115154	0	0	0	0
k__Bacteria|p__Acidobacteriota|c__Acidobacteriae|o__Acidobacteriales|f__Acidobacteriaceae_(Subgroup_1)|g__uncultured	0	0	0	0	0	0	0	0	0	0	0	0	0	0	0	0	0.000191924	0
k__Bacteria|p__Acidobacteriota|c__Vicinamibacteria|o__Subgroup_17|f__Subgroup_17|g__Subgroup_17	0	0	0	0	0	0	0	0	0	0	0	0	0	0.000153539	0	0	0	0
k__Bacteria|p__Actinobacteriota|c__Acidimicrobiia|o__uncultured	0	0	0	0	0	0	0	0	0	0	0	0.000191924	0	0	0	0	0	0
k__Bacteria|p__Actinobacteriota|c__Actinobacteria|o__Frankiales|f__Geodermatophilaceae|g__Modestobacter	0	0	0	0	0.000191924	0	0	0	0	0	0	0	0	0	0	0	0	0
k__Bacteria|p__Actinobacteriota|c__Actinobacteria|o__Propionibacteriales|f__Propionibacteriaceae|g__Cutibacterium	0.000115154	7.67695e-05	0	0	0	0	0	0	0	0	0	0	0	0	0	0	0	0
k__Bacteria|p__Bacteroidota|c__Bacteroidia|o__Bacteroidales|f__Marinifilaceae|g__Butyricimonas	0	0	0	0	0	0	0	0	0	0.000115154	0	0	3.83848e-05	0	0	0	0	3.83848e-05
k__Bacteria|p__Bacteroidota|c__Bacteroidia|o__Bacteroidales|f__Marinilabiliaceae|g__[Cytophaga]_xylanolytica_group	0.000191924	0	0	0	0	0	0	0	0	0	0	0	0	0	0	0	0	0
k__Bacteria|p__Bacteroidota|c__Bacteroidia|o__Chitinophagales|f__Saprospiraceae|g__Membranicola	0	0	0	0	0	0	0	0	0	0	0	0	0	0	0	0	0	0
k__Bacteria|p__Bacteroidota|c__Bacteroidia|o__Cytophagales|f__Microscillaceae|g__uncultured	0	0	0.000191924	0	0	0	0	0	0	0	0	0	0	0	0	0	0	0
k__Bacteria|p__Bacteroidota|c__Bacteroidia|o__Flavobacteriales|f__Flavobacteriaceae|g__Aquibacter	0	0	0	0.000115154	0	0	0	0	0	0	0	0	0	0	0	0	0	0
k__Bacteria|p__Caldatribacteriota|c__Caldatribacteriia|o__Caldatribacteriales|f__Caldatribacteriaceae|g__Candidatus_Caldatribacterium	0.000191924	0	0	0	0	0	0	0	0	0	0	0	0	0	0	0	0	0
k__Bacteria|p__Deinococcota|c__Deinococci|o__Deinococcales|f__Deinococcaceae|g__Deinococcus	0	0	0	0	0	0	0	0	0	7.67695e-05	0	0	0	0	0	0	0.000115154	0
k__Bacteria|p__Firmicutes|c__Bacilli|o__Erysipelotrichales|f__Erysipelatoclostridiaceae|g__UCG-004	0	0	0	0	0	0	0	0	0	7.67695e-05	0	0	0	0	0	0	0.000115154	0
k__Bacteria|p__Firmicutes|c__Bacilli|o__Erysipelotrichales|f__Erysipelotrichaceae|g__Erysipelotrichaceae	0	0	0	0	0.000115154	0	0	0	0	0	0	0	0	0	0	0	0	0
k__Bacteria|p__Firmicutes|c__Clostridia|o__Clostridiales|f__Clostridiaceae|g__Proteiniclasticum	3.83848e-05	0	0.000153539	0	0	0	0	0	0	0	0	0	0	0	0	0	0	0
k__Bacteria|p__Firmicutes|c__Clostridia|o__Lachnospirales|f__Lachnospiraceae|g__Anaerocolumna	0	0.000191924	0	0	0	0	0	0	0	0	0	0	0	0	0	0	0	0
k__Bacteria|p__Firmicutes|c__Clostridia|o__Lachnospirales|f__Lachnospiraceae|g__Lachnospiraceae_NK4B4_group	0	0	0	0	0	0	0	0	0	0	0	0	0	0	0	0	0	0
k__Bacteria|p__Firmicutes|c__Clostridia|o__Oscillospirales|f__Oscillospirales|g__Hydrogenoanaerobacterium	0	0	0	0	0	0	0	0	0	0	0	0	0	0	0	0	0	0
k__Bacteria|p__Firmicutes|c__Clostridia|o__Oscillospirales|f__Ruminococcaceae|g__DTU089	0	0	0	0	0	0	0	0	0	0	0	0	0	0	0	0	0	0
k__Bacteria|p__Firmicutes|c__Clostridia|o__Peptostreptococcales-Tissierellales|f__Peptostreptococcales-Tissierellales|g__Parvimonas	0	0	0	0	0	0	0	0.000191924	0	0	0	0	0	0	0	0	0	0
k__Bacteria|p__Gemmatimonadota|c__AKAU4049|o__AKAU4049|f__AKAU4049|g__AKAU4049	0	0	0	0	0	0	0	0	0	0	0	0	0	0	0	0	0	0
k__Bacteria|p__Proteobacteria|c__Alphaproteobacteria|o__Rhizobiales|f__Beijerinckiaceae|g__uncultured	0	0	0	0	0	0	0	0	0	0	0	0.000191924	0	0	0	0	0	0
k__Bacteria|p__Acidobacteriota|c__Blastocatellia|o__Blastocatellales|f__Blastocatellaceae|g__Blastocatella	0	0	0	0	0	0	0.000153539	0	0	0	0	0	0	0	0	0	0	0
k__Bacteria|p__Acidobacteriota|c__Holophagae|o__Subgroup_7|f__Subgroup_7|g__Subgroup_7	0	0	0	7.67695e-05	0	0	0	0	0	0	0	0	0	7.67695e-05	0	0	0	0
k__Bacteria|p__Actinobacteriota|c__Acidimicrobiia|o__Microtrichales|f__Iamiaceae|g__Iamia	0	0	0	0	0	0	0	0.000153539	0	0	0	0	0	0	0	0	0	0
k__Bacteria|p__Actinobacteriota|c__Acidimicrobiia|o__Microtrichales|f__uncultured|g__uncultured	0	0	0	0	0	0	0.000115154	0	0	0	0	3.83848e-05	0	0	0	0	0	0
k__Bacteria|p__Actinobacteriota|c__Actinobacteria|o__Corynebacteriales|f__Nocardiaceae|g__Gordonia	0	0	0	0	0	0	0	0	0	0.000153539	0	0	0	0	0	0	0	0
k__Bacteria|p__Actinobacteriota|c__Actinobacteria|o__Micrococcales|f__Sanguibacteraceae|g__Sanguibacter	0	0	0	0	0	0	0	0	0	0.000153539	0	0	0	0	0	0	0	0
k__Bacteria|p__Actinobacteriota|c__Actinobacteria|o__PeM15|f__PeM15|g__PeM15	0	0	0	0	0	0	0.000115154	3.83848e-05	0	0	0	0	0	0	0	0	0	0
k__Bacteria|p__Bacteroidota|c__Bacteroidia|o__Flavobacteriales|f__Flavobacteriaceae|g__Capnocytophaga	0	0	0	0	0	0	0	0	0	0	0	0	0	0	3.83848e-05	0	0	0
k__Bacteria|p__Chloroflexi|c__Anaerolineae|o__uncultured|f__uncultured|g__uncultured	0	0.000153539	0	0	0	0	0	0	0	0	0	0	0	0	0	0	0	0
k__Bacteria|p__Desulfobacterota|c__uncultured|o__uncultured|f__uncultured|g__uncultured	0	0	0	0	0	0	0	0	0.000153539	0	0	0	0	0	0	0	0	0
k__Bacteria|p__Firmicutes|c__Bacilli|o__Paenibacillales|f__Paenibacillaceae|g__Paenibacillus	0	0	0	3.83848e-05	0	0	0	0	0	0	0	0.000115154	0	0	0	0	0	0
k__Bacteria|p__Firmicutes|c__Clostridia|o__Clostridia|f__Hungateiclostridiaceae|g__Mageibacillus	0	0	0.000153539	0	0	0	0	0	0	0	0	0	0	0	0	0	0	0
k__Bacteria|p__Firmicutes|c__Clostridia|o__Lachnospirales|f__Lachnospiraceae|g__Lachnospiraceae_FCS020_group	0	0	0	0.000153539	0	0	0	0	0	0	0	0	0	0	0	0	0	0
k__Bacteria|p__Firmicutes|c__Clostridia|o__Oscillospirales|f__uncultured|g__uncultured	0	0	0	0	0	0	0	0	0	0	0	0	0	0	0	7.67695e-05	7.67695e-05	0
k__Bacteria|p__Firmicutes|c__Negativicutes|o__Veillonellales-Selenomonadales|f__Selenomonadaceae|g__Selenomonas	0	0	0	0	0	0	0	0	0	3.83848e-05	0	0	0	0	0	0	0	0
k__Bacteria|p__Gemmatimonadota|c__Gemmatimonadetes|o__Gemmatimonadales|f__Gemmatimonadaceae|g__Roseisolibacter	0	0	0	0	0	0	0	0	0	0	0.000115154	0	0	0	0	0	0	0
k__Bacteria|p__Patescibacteria|c__Saccharimonadia|o__Saccharimonadales|f__Saccharimonadales|g__Saccharimonadales	0	0	0.000115154	3.83848e-05	0	0	0	0	0	0	0	0	0	0	0	0	0	0
k__Bacteria|p__Proteobacteria|c__Alphaproteobacteria|o__Azospirillales|f__uncultured|g__uncultured	0	0	0	0	0	0	0	0	0	0	0	0	0	0	0	0	0	0
k__Bacteria|p__Proteobacteria|c__Alphaproteobacteria|o__Micropepsales|f__Micropepsaceae|g__uncultured	0	0	0	0	0	0	0	0	0	0	0	0	0	0	0	0.000153539	0	0
k__Bacteria|p__Proteobacteria|c__Alphaproteobacteria|o__Rhizobiales|f__Beijerinckiaceae|g__Microvirga	0	0	0	0	0	0	0	0	0	0	0	0	0	0	0	0	0	0
k__Bacteria|p__Proteobacteria|c__Alphaproteobacteria|o__Rhodobacterales|f__Rhodobacteraceae|g__Pseudophaeobacter	0	0	0	0	0	0	0	0	0	0	0	0	0	0	0	0	0	0
k__Bacteria|p__Proteobacteria|c__Alphaproteobacteria|o__Rhodobacterales|f__Rhodobacteraceae|g__Rhodobacter	0	0	0	0	0	0	0.000153539	0	0	0	0	0	0	0	0	0	0	0
k__Bacteria|p__Proteobacteria|c__Alphaproteobacteria|o__Sphingomonadales|f__Sphingomonadaceae|g__Porphyrobacter	0	0	0	0	0	0	0	0	0	0	0	0	0	0	0	0	0	0
k__Bacteria|p__Proteobacteria|c__Gammaproteobacteria|o__Burkholderiales|f__Comamonadaceae|g__Aquabacterium	0	0	0	0	0	0	0.000115154	0	0	0	3.83848e-05	0	0	0	0	0	0	0
k__Bacteria|p__Proteobacteria|c__Gammaproteobacteria|o__Burkholderiales|f__Hydrogenophilaceae|g__Thiobacillus	0	0	0.000153539	0	0	0	0	0	0	0	0	0	0	0	0	0	0	0
k__Bacteria|p__Proteobacteria|c__Gammaproteobacteria|o__Burkholderiales|f__Oxalobacteraceae|g__Noviherbaspirillum	0	0	0	0.000153539	0	0	0	0	0	0	0	0	0	0	0	0	0	0
k__Bacteria|p__Proteobacteria|c__Gammaproteobacteria|o__Burkholderiales|f__Sutterellaceae|g__uncultured	0	0	0	0	0	0	0	0	0	0	0	0	0	0	0	0	0	0
k__Bacteria|p__Proteobacteria|c__Gammaproteobacteria|o__Burkholderiales|f__TRA3-20|g__TRA3-20	0	0	0	0	0	0	0	0	0	0	0	0	0	0	0	0	0	0
k__Bacteria|p__Proteobacteria|c__Gammaproteobacteria|o__Cellvibrionales|f__Spongiibacteraceae|g__BD1-7_clade	0	0	0	0	0	0	0	0	0	0	0	0	0	0	0	0	0	0
k__Bacteria|p__Proteobacteria|c__Gammaproteobacteria|o__Oceanospirillales|f__Litoricolaceae|g__Litoricola	0	0	0	0	0	0	0	0	0	0	0	0	0.000153539	0	0	0	0	0
k__Bacteria|p__Proteobacteria|c__Gammaproteobacteria|o__Xanthomonadales|f__Rhodanobacteraceae|g__Rhodanobacter	0	0	0	0	0	0	0	0	0	0	0	0	0	0	0	0	0	0
k__Bacteria|p__Proteobacteria|c__uncultured	0	0	0	0	0	0	0	0	0	3.83848e-05	0	0	0	0	0	0	0	0
k__Bacteria|p__Actinobacteriota|c__Acidimicrobiia|o__IMCC26256|f__IMCC26256|g__IMCC26256	0	0	0	0	0	0	0	0	0	0	0	0.000115154	0	0	0	0	0	0
k__Bacteria|p__Actinobacteriota|c__Actinobacteria|o__Corynebacteriales|f__Mycobacteriaceae|g__Mycobacterium	0	7.67695e-05	0	0	0	0	3.83848e-05	0	0	0	0	0	0	0	0	0	0	0
k__Bacteria|p__Actinobacteriota|c__Thermoleophilia|o__Gaiellales|f__uncultured|g__uncultured	0	0	0	0	0	0	0	0	0	0	0	0	0	0	0	0	0	0
k__Bacteria|p__Bacteroidota|c__Bacteroidia|o__Chitinophagales|f__Chitinophagaceae|g__Taibaiella	0	0	0	0	0	0	0	0	3.83848e-05	0	0	3.83848e-05	0	0	0	0	0	0
k__Bacteria|p__Bacteroidota|c__Bacteroidia|o__Chitinophagales|f__Saprospiraceae|g__Candidatus_Aquirestis	0	0	0	0	0	0	0	0	0	0	0	0	7.67695e-05	0	0	0	0	0
k__Bacteria|p__Bacteroidota|c__Bacteroidia|o__Flavobacteriales|f__Flavobacteriaceae|g__Salegentibacter	0	0	0	0.000115154	0	0	0	0	0	0	0	0	0	0	0	0	0	0
k__Bacteria|p__Campilobacterota|c__Campylobacteria|o__Campylobacterales|f__Sulfurovaceae|g__Sulfurovum	0	0	0.000115154	0	0	0	0	0	0	0	0	0	0	0	0	0	0	0
k__Bacteria|p__Cloacimonadota|c__Cloacimonadia|o__Cloacimonadales|f__uncultured	0	0	0	0	0	0	0	0	0.000115154	0	0	0	0	0	0	0	0	0
k__Bacteria|p__Myxococcota|c__Myxococcia|o__Myxococcales|f__Myxococcaceae|g__uncultured	0	0	0	0	0	0	0	0	0	0	0.000115154	0	0	0	0	0	0	0
k__Bacteria|p__NB1-j|c__NB1-j|o__NB1-j|f__NB1-j|g__NB1-j	0	0	0	0	0	0	0	0	0	0	0	0	0.000115154	0	0	0	0	0
k__Bacteria|p__Nitrospirota|c__Thermodesulfovibrionia|o__uncultured|f__uncultured|g__uncultured	0	0	0	0.000115154	0	0	0	0	0	0	0	0	0	0	0	0	0	0
k__Bacteria|p__Patescibacteria|c__Saccharimonadia|o__Saccharimonadales|f__uncultured	0	0.000115154	0	0	0	0	0	0	0	0	0	0	0	0	0	0	0	0
k__Bacteria|p__Proteobacteria|c__Alphaproteobacteria|o__Acetobacterales|f__Acetobacteraceae|g__Acidicaldus	0	0	0	0	0	0	0	0	0	0	0	0	0	0	0	0	0	0
k__Bacteria|p__Proteobacteria|c__Alphaproteobacteria|o__Rhizobiales|f__Devosiaceae|g__Devosia	0	0	0	0	0	0	0	0	0	0	0	0	0	0.000115154	0	0	0	0
k__Bacteria|p__Proteobacteria|c__Gammaproteobacteria|o__Alteromonadales|f__Alteromonadaceae|g__Rheinheimera	0	0	0	0	0	0	0	0	0	0	0	0	0	0	0	0	0	0
k__Bacteria|p__Proteobacteria|c__Gammaproteobacteria|o__Burkholderiales|f__Alcaligenaceae|g__GKS98_freshwater_group	0	0	0	0	0	0	0	0	0	0	0	0	0	0	0	0	0	0
k__Bacteria|p__Proteobacteria|c__Gammaproteobacteria|o__Burkholderiales|f__Alcaligenaceae|g__Pusillimonas	0	0	0	0	0	0	0	0	0	0.000115154	0	0	0	0	0	0	0	0
k__Bacteria|p__Proteobacteria|c__Gammaproteobacteria|o__Burkholderiales|f__Rhodocyclaceae|g__Thauera	0	0	0	0	0	0	0	0	0	0	0	0	0	0	0	0	0	0
k__Bacteria|p__Proteobacteria|c__Gammaproteobacteria|o__Cellvibrionales|f__Spongiibacteraceae|g__Spongiibacter	0	0	0	0	0	0	0	0	0	0	0	0	0	0	0	0	0	0
k__Bacteria|p__Proteobacteria|c__Gammaproteobacteria|o__Diplorickettsiales|f__Diplorickettsiaceae|g__uncultured	0	0	0	0	0	0	0	0	0	0.000115154	0	0	0	0	0	0	0	0
k__Bacteria|p__Proteobacteria|c__Gammaproteobacteria|o__Oceanospirillales|f__Nitrincolaceae|g__Amphritea	0	0	0	0	0	0	0	0	0	0	0	0	7.67695e-05	3.83848e-05	0	0	0	0
k__Bacteria|p__Proteobacteria|c__Gammaproteobacteria|o__Pasteurellales|f__Pasteurellaceae|g__Actinobacillus	0	0	0	0	0	0	0	0	0	0	0	0	0	0	0	0	0.000115154	0
k__Bacteria|p__Proteobacteria|c__Gammaproteobacteria|o__Pseudomonadales|f__Moraxellaceae|g__Enhydrobacter	0	0	0	0	0	0	0	0	0	0	0	0	0	0	0	0	0	0
k__Bacteria|p__Proteobacteria|c__Gammaproteobacteria|o__Pseudomonadales|f__Moraxellaceae|g__Moraxella	0	0	0	0	0	0	0	0	0	0	0	0	0	0	0	0	0	0.000115154
k__Bacteria|p__Proteobacteria|c__Gammaproteobacteria|o__uncultured	0	0	0	0	0	0	0	0	0	0	0	0	3.83848e-05	0	0	0	0	3.83848e-05
k__Bacteria|p__Proteobacteria|c__Gammaproteobacteria|o__Xanthomonadales|f__Rhodanobacteraceae|g__Chujaibacter	0	3.83848e-05	0	0	0	0	0	7.67695e-05	0	0	0	0	0	0	0	0	0	0
k__Bacteria|p__Verrucomicrobiota|c__Chlamydiae|o__Chlamydiales|f__Parachlamydiaceae|g__uncultured	0	0	0	0	0	3.83848e-05	7.67695e-05	0	0	0	0	0	0	0	0	0	0	0
k__Bacteria|p__Verrucomicrobiota|c__Verrucomicrobiae|o__Chthoniobacterales|f__Chthoniobacteraceae|g__Chthoniobacter	0	0	0	0	0	0	0	0	0	0	0	0.000115154	0	0	0	0	0	0
k__Bacteria|p__Verrucomicrobiota|c__Verrucomicrobiae|o__Chthoniobacterales|f__Chthoniobacteraceae|g__LD29	0	0	0	0	0	0	0	0	0	0.000115154	0	0	0	0	0	0	0	0
k__Bacteria|p__Actinobacteriota|c__Actinobacteria|o__Micromonosporales|f__Micromonosporaceae|g__Virgisporangium	0	0	0	0	0	0	0	0	0	0	0	7.67695e-05	0	0	0	0	0	0
k__Bacteria|p__Actinobacteriota|c__Actinobacteria|o__Streptomycetales|f__Streptomycetaceae|g__Streptomyces	0	0	0	0	0	0	0	0	0	0	0	7.67695e-05	0	0	0	0	0	0
k__Bacteria|p__Actinobacteriota|c__Coriobacteriia|o__Coriobacteriales|f__Coriobacteriaceae|g__Collinsella	0	0	0	0	0	7.67695e-05	0	0	0	0	0	0	0	0	0	0	0	0
k__Bacteria|p__Armatimonadota|c__Fimbriimonadia|o__Fimbriimonadales|f__Fimbriimonadaceae|g__Fimbriimonas	0	0	0	0	0	0	0	0	0	0	0	7.67695e-05	0	0	0	0	0	0
k__Bacteria|p__Bacteroidota|c__Bacteroidia|o__Bacteroidales|f__Barnesiellaceae|g__uncultured	0	0	0	0	0	0	0	0	0	0	0	0	7.67695e-05	0	0	0	0	0
k__Bacteria|p__Bacteroidota|c__Bacteroidia|o__Chitinophagales|f__Chitinophagaceae|g__Terrimonas	7.67695e-05	0	0	0	0	0	0	0	0	0	0	0	0	0	0	0	0	0
k__Bacteria|p__Bacteroidota|c__Bacteroidia|o__Cytophagales|f__Microscillaceae|g__Chryseolinea	0	0	0	0	0	0	0	0	0	0	0	0	0	0	0	0	7.67695e-05	0
k__Bacteria|p__Bacteroidota|c__Bacteroidia|o__Flavobacteriales|f__Cryomorphaceae|g__uncultured	0	0	0	0	0	7.67695e-05	0	0	0	0	0	0	0	0	0	0	0	0
k__Bacteria|p__Bacteroidota|c__Bacteroidia|o__Flavobacteriales|f__Weeksellaceae|g__Moheibacter	0	0	0	0	0	0	0	0	0	0	0	0	0	0	0	0	0	0
k__Bacteria|p__Campilobacterota|c__Campylobacteria|o__Campylobacterales|f__Arcobacteraceae|g__Malaciobacter	0	0	0	0	0	0	0	0	0	0	0	0	0	7.67695e-05	0	0	0	0
k__Bacteria|p__Chloroflexi|c__Anaerolineae|o__SBR1031|f__SBR1031|g__SBR1031	0	0	0	0	0	0	0	0	7.67695e-05	0	0	0	0	0	0	0	0	0
k__Bacteria|p__Cyanobacteria|c__Cyanobacteriia|o__Synechococcales|f__Cyanobiaceae|g__Synechococcus_CC9902	0	0	0	0	0	0	0	0	0	0	0	0	0	0	0	0	0	0
k__Bacteria|p__Dadabacteria|c__Dadabacteriia|o__Dadabacteriales|f__Dadabacteriales|g__Dadabacteriales	0	0	0	0	0	0	0	0	0	7.67695e-05	0	0	0	0	0	0	0	0
k__Bacteria|p__Deinococcota|c__Deinococci|o__Deinococcales|f__Trueperaceae|g__Truepera	0	0	0	0	0	0	0	0	0	0	0	0	0	0	0	0	0	0
k__Bacteria|p__Desulfobacterota|c__Desulfuromonadia|o__Geobacterales|f__Geobacteraceae|g__uncultured	0	0	0	7.67695e-05	0	0	0	0	0	0	0	0	0	0	0	0	0	0
k__Bacteria|p__Fermentibacterota|c__Fermentibacteria|o__Fermentibacterales|f__Fermentibacteraceae|g__Fermentibacteraceae	0	0	0	0	0	0	0	0	0	7.67695e-05	0	0	0	0	0	0	0	0
k__Bacteria|p__Firmicutes|c__Bacilli|o__Bacillales|f__Planococcaceae|g__Planococcus	0	0	0	0	0	0	7.67695e-05	0	0	0	0	0	0	0	0	0	0	0
k__Bacteria|p__Firmicutes|c__Bacilli|o__Izemoplasmatales|f__Izemoplasmatales|g__Izemoplasmatales	0	0	0	0	0	0	0	0	0	0	0	0	0	0	0	0	0	0
k__Bacteria|p__Firmicutes|c__Bacilli|o__Lactobacillales|f__Listeriaceae|g__Brochothrix	0	0	0	0	0	0	7.67695e-05	0	0	0	0	0	0	0	0	0	0	0
k__Bacteria|p__Firmicutes|c__Clostridia|o__Clostridiales|f__Clostridiaceae|g__Clostridium_sensu_stricto_10	0	0	0	0	0	0	0	0	0	0	0	7.67695e-05	0	0	0	0	0	0
k__Bacteria|p__Firmicutes|c__Clostridia|o__Lachnospirales|f__Lachnospiraceae|g__[Eubacterium]_oxidoreducens_group	0	0	0	0	0	0	0	0	0	0	0	0	0	0	0	0	0	0
k__Bacteria|p__Firmicutes|c__Clostridia|o__Lachnospirales|f__Lachnospiraceae|g__Catonella	0	0	0	0	0	0	0	0	0	0	0	0	0	0	0	0	0	0
k__Bacteria|p__Gemmatimonadota|c__S0134_terrestrial_group|o__S0134_terrestrial_group|f__S0134_terrestrial_group|g__S0134_terrestrial_group	3.83848e-05	0	0	0	0	0	0	0	0	0	0	0	0	0	0	0	0	0
k__Bacteria|p__Myxococcota|c__bacteriap25|o__bacteriap25|f__bacteriap25|g__bacteriap25	0	0	0	0	0	0	0	0	0	0	0	0	0	0	0	0	7.67695e-05	0
k__Bacteria|p__Myxococcota|c__Polyangia|o__Haliangiales|f__Haliangiaceae|g__Haliangium	0	0	0	0	0	0	3.83848e-05	0	0	0	0	0	0	0	0	0	0	0
k__Bacteria|p__Proteobacteria|c__Alphaproteobacteria|o__Caulobacterales|f__Caulobacteraceae|g__Phenylobacterium	0	0	0	0	7.67695e-05	0	0	0	0	0	0	0	0	0	0	0	0	0
k__Bacteria|p__Proteobacteria|c__Alphaproteobacteria|o__Rhizobiales|f__Beijerinckiaceae|g__alphaI_cluster	0	0	0	0	0	0	7.67695e-05	0	0	0	0	0	0	0	0	0	0	0
k__Bacteria|p__Proteobacteria|c__Alphaproteobacteria|o__Sphingomonadales|f__Sphingomonadaceae|g__Sphingopyxis	0	0	0	0	0	0	7.67695e-05	0	0	0	0	0	0	0	0	0	0	0
k__Bacteria|p__Proteobacteria|c__Gammaproteobacteria|o__Burkholderiales|f__Burkholderiaceae|g__Lautropia	0	0	0	0	0	0	0	0	0	0	0	0	0	0	3.83848e-05	3.83848e-05	0	0
k__Bacteria|p__Proteobacteria|c__Gammaproteobacteria|o__Burkholderiales|f__Burkholderiaceae|g__Ralstonia	0	0	0	0	0	0	0	0	0	0	0	7.67695e-05	0	0	0	0	0	0
k__Bacteria|p__Proteobacteria|c__Gammaproteobacteria|o__Burkholderiales|f__Comamonadaceae|g__Ramlibacter	0	0	0	0	0	0	0	7.67695e-05	0	0	0	0	0	0	0	0	0	0
k__Bacteria|p__Proteobacteria|c__Gammaproteobacteria|o__Burkholderiales|f__Oxalobacteraceae|g__uncultured	0	7.67695e-05	0	0	0	0	0	0	0	0	0	0	0	0	0	0	0	0
k__Bacteria|p__Proteobacteria|c__Gammaproteobacteria|o__Burkholderiales|f__Rhodocyclaceae|g__Azospira	0	0	0	0	0	0	0	0	0	0	0	0	0	0	0	0	0	0
k__Bacteria|p__Proteobacteria|c__Gammaproteobacteria|o__Cellvibrionales|f__Cellvibrionaceae|g__Aestuariicella	0	0	0	0	0	0	0	0	0	0	0	0	0	0	0	0	0	0
k__Bacteria|p__Proteobacteria|c__Gammaproteobacteria|o__Steroidobacterales|f__Steroidobacteraceae|g__uncultured	0	0	0	0	0	0	0	0	0	0	0	0	7.67695e-05	0	0	0	0	0
k__Bacteria|p__Synergistota|c__Synergistia|o__Synergistales|f__Synergistaceae|g__Synergistes	0	0	0	0	0	0	0	0	0	0	7.67695e-05	0	0	0	0	0	0	0
k__Bacteria|p__Acidobacteriota|c__uncultured	0	0	0	0	0	0	0	0	0	0	0	3.83848e-05	0	0	0	0	0	0
k__Bacteria|p__Acidobacteriota|c__Vicinamibacteria|o__Vicinamibacterales|f__Vicinamibacteraceae|g__Vicinamibacter	0	0	0	0	3.83848e-05	0	0	0	0	0	0	0	0	0	0	0	0	0
k__Bacteria|p__Actinobacteriota|c__Acidimicrobiia|o__Actinomarinales|f__Actinomarinaceae|g__Candidatus_Actinomarina	0	0	0	0	0	0	0	3.83848e-05	0	0	0	0	0	0	0	0	0	0
k__Bacteria|p__Actinobacteriota|c__Actinobacteria|o__Corynebacteriales|f__Corynebacteriaceae|g__uncultured	0	0	0	0	0	0	0	0	0	0	0	0	3.83848e-05	0	0	0	0	0
k__Bacteria|p__Actinobacteriota|c__Actinobacteria|o__Micrococcales|f__uncultured	0	3.83848e-05	0	0	0	0	0	0	0	0	0	0	0	0	0	0	0	0
k__Bacteria|p__Actinobacteriota|c__Actinobacteria|o__Propionibacteriales|f__Propionibacteriaceae|g__Microlunatus	0	0	0	0	0	0	0	0	0	0	0	0	0	3.83848e-05	0	0	0	0
k__Bacteria|p__Actinobacteriota|c__Thermoleophilia|o__Solirubrobacterales|f__Solirubrobacteraceae|g__Parviterribacter	3.83848e-05	0	0	0	0	0	0	0	0	0	0	0	0	0	0	0	0	0
k__Bacteria|p__Actinobacteriota|c__Thermoleophilia|o__Solirubrobacterales|f__uncultured	0	0	0	0	0	0	0	0	0	0	0	3.83848e-05	0	0	0	0	0	0
k__Bacteria|p__Bacteroidota|c__Bacteroidia|o__Bacteroidales|f__Dysgonomonadaceae|g__Fermentimonas	3.83848e-05	0	0	0	0	0	0	0	0	0	0	0	0	0	0	0	0	0
k__Bacteria|p__Bacteroidota|c__Bacteroidia|o__Bacteroidales|f__Prevotellaceae|g__Prevotellaceae_Ga6A1_group	0	0	0	0	0	0	0	0	0	0	0	0	0	0	0	0	0	0
k__Bacteria|p__Bacteroidota|c__Bacteroidia|o__Chitinophagales|f__Chitinophagaceae|g__Chitinophagaceae	0	0	0	0	0	0	0	0	3.83848e-05	0	0	0	0	0	0	0	0	0
k__Bacteria|p__Bacteroidota|c__Bacteroidia|o__Chitinophagales|f__Chitinophagaceae|g__Flaviaesturariibacter	0	0	0	0	0	0	0	0	0	0	0	0	0	0	0	0	0	0
k__Bacteria|p__Bacteroidota|c__Bacteroidia|o__Flavobacteriales|f__Flavobacteriaceae|g__Gelidibacter	0	0	0	0	0	0	0	0	0	0	0	0	0	0	0	0	0	0
k__Bacteria|p__Bacteroidota|c__Bacteroidia|o__Flavobacteriales|f__Flavobacteriaceae|g__NS5_marine_group	0	0	0	0	0	0	0	0	0	0	0	0	0	0	0	0	0	0
k__Bacteria|p__Bacteroidota|c__Bacteroidia|o__Sphingobacteriales|f__Sphingobacteriaceae|g__Pedobacter	0	0	0	0	0	0	0	0	0	3.83848e-05	0	0	0	0	0	0	0	0
k__Bacteria|p__Chloroflexi|c__Anaerolineae|o__Ardenticatenales|f__uncultured|g__uncultured	0	0	0	0	0	0	0	0	0	0	0	0	0	0	0	0	0	0
k__Bacteria|p__Chloroflexi|c__Anaerolineae|o__SBR1031|f__A4b|g__A4b	0	0	0	0	0	0	0	0	0	0	0	3.83848e-05	0	0	0	0	0	0
k__Bacteria|p__Chloroflexi|c__Anaerolineae|o__SBR1031|f__uncultured	0	0	0	0	0	3.83848e-05	0	0	0	0	0	0	0	0	0	0	0	0
k__Bacteria|p__Firmicutes|c__Bacilli|o__Lactobacillales|f__Enterococcaceae|g__uncultured	0	0	0	0	0	0	0	0	0	0	0	0	0	0	0	0	0	0
k__Bacteria|p__Firmicutes|c__Clostridia|o__Eubacteriales|f__Eubacteriaceae|g__Eubacterium	0	0	0	0	0	0	0	0	0	3.83848e-05	0	0	0	0	0	0	0	0
k__Bacteria|p__Firmicutes|c__Clostridia|o__Peptostreptococcales-Tissierellales|f__uncultured	0	0	0	0	0	0	0	0	0	0	0	0	0	0	0	0	0	0
k__Bacteria|p__GAL15|c__GAL15|o__GAL15|f__GAL15|g__GAL15	0	0	0	0	0	0	0	3.83848e-05	0	0	0	0	0	0	0	0	0	0
k__Bacteria|p__Gemmatimonadota|c__Longimicrobia|o__Longimicrobiales|f__Longimicrobiaceae|g__uncultured	3.83848e-05	0	0	0	0	0	0	0	0	0	0	0	0	0	0	0	0	0
k__Bacteria|p__Latescibacterota|c__Latescibacterota|o__Latescibacterota|f__Latescibacterota|g__Latescibacterota	0	0	0	0	0	0	0	0	0	0	0	0	0	0	0	0	3.83848e-05	0
k__Bacteria|p__Patescibacteria|c__Gracilibacteria|o__Absconditabacteriales_(SR1)|f__Absconditabacteriales_(SR1)|g__Absconditabacteriales_(SR1)	0	0	0	0	0	0	0	0	0	0	0	0	0	0	0	0	0	3.83848e-05
k__Bacteria|p__Patescibacteria|c__Parcubacteria|o__Parcubacteria|f__Parcubacteria|g__Parcubacteria	0	0	0	0	0	0	0	0	0	0	0	0	0	0	0	3.83848e-05	0	0
k__Bacteria|p__Planctomycetota|c__OM190|o__OM190|f__OM190|g__OM190	0	0	0	0	0	0	0	3.83848e-05	0	0	0	0	0	0	0	0	0	0
k__Bacteria|p__Proteobacteria|c__Alphaproteobacteria|o__Rhizobiales|f__Devosiaceae|g__Pelagibacterium	0	0	0	0	0	0	0	0	0	0	3.83848e-05	0	0	0	0	0	0	0
k__Bacteria|p__Proteobacteria|c__Alphaproteobacteria|o__Rhizobiales|f__KF-JG30-B3|g__KF-JG30-B3	0	0	0	0	0	0	0	0	0	0	0	0	0	0	0	0	0	0
k__Bacteria|p__Proteobacteria|c__Alphaproteobacteria|o__Rhizobiales|f__Rhizobiaceae|g__Allorhizobium-Neorhizobium-Pararhizobium-Rhizobium	0	0	0	0	0	0	3.83848e-05	0	0	0	0	0	0	0	0	0	0	0
k__Bacteria|p__Proteobacteria|c__Alphaproteobacteria|o__Rhizobiales|f__Xanthobacteraceae|g__Bradyrhizobium	0	0	0	0	0	0	0	3.83848e-05	0	0	0	0	0	0	0	0	0	0
k__Bacteria|p__Proteobacteria|c__Alphaproteobacteria|o__Rhodobacterales|f__Rhodobacteraceae|g__Shimia	0	0	0	0	0	0	0	0	0	0	0	0	0	0	0	0	3.83848e-05	0
k__Bacteria|p__Proteobacteria|c__Alphaproteobacteria|o__Sphingomonadales|f__Sphingomonadaceae|g__DSSF69	0	0	0	0	0	0	0	0	0	0	0	0	0	0	0	0	0	0
k__Bacteria|p__Proteobacteria|c__Gammaproteobacteria|o__Burkholderiales|f__Burkholderiaceae|g__uncultured	0	0	0	0	0	0	0	0	0	0	0	3.83848e-05	0	0	0	0	0	0
k__Bacteria|p__Proteobacteria|c__Gammaproteobacteria|o__Burkholderiales|f__Comamonadaceae|g__Sphaerotilus	0	0	0	0	0	0	0	0	0	0	0	0	0	0	0	0	0	0
k__Bacteria|p__Proteobacteria|c__Gammaproteobacteria|o__Burkholderiales|f__Gallionellaceae|g__uncultured	0	0	0	0	0	3.83848e-05	0	0	0	0	0	0	0	0	0	0	0	0
k__Bacteria|p__Proteobacteria|c__Gammaproteobacteria|o__Burkholderiales|f__Methylophilaceae|g__Candidatus_Methylopumilus	0	0	0	0	0	0	0	0	0	0	0	0	0	0	0	0	3.83848e-05	0
k__Bacteria|p__Proteobacteria|c__Gammaproteobacteria|o__Burkholderiales|f__Neisseriaceae|g__Vitreoscilla	0	0	0	0	0	0	0	0	0	0	0	0	0	0	0	3.83848e-05	0	0
k__Bacteria|p__Proteobacteria|c__Gammaproteobacteria|o__Chromatiales|f__Chromatiaceae|g__Candidatus_Thiobios	0	0	0	0	0	0	0	3.83848e-05	0	0	0	0	0	0	0	0	0	0
k__Bacteria|p__Proteobacteria|c__Gammaproteobacteria|o__Oceanospirillales|f__Halomonadaceae|g__uncultured	0	0	0	0	0	0	0	0	0	0	0	0	0	0	0	0	0	0
k__Bacteria|p__Proteobacteria|c__Gammaproteobacteria|o__Oceanospirillales|f__Saccharospirillaceae|g__Thalassolituus	0	0	0	0	0	0	0	0	0	0	0	0	0	0	0	0	0	0
k__Bacteria|p__Proteobacteria|c__Gammaproteobacteria|o__Oceanospirillales|f__uncultured	0	0	0	0	0	0	0	0	0	0	0	0	3.83848e-05	0	0	0	0	0
k__Bacteria|p__Proteobacteria|c__Gammaproteobacteria|o__OM182_clade|f__OM182_clade|g__OM182_clade	0	0	0	0	0	0	0	0	0	0	0	0	0	0	0	0	0	0
k__Bacteria|p__Proteobacteria|c__Gammaproteobacteria|o__Pseudomonadales|f__Pseudomonadaceae|g__Thiopseudomonas	0	0	0	0	0	0	0	0	0	0	0	0	0	0	0	0	0	0
k__Bacteria|p__Proteobacteria|c__Gammaproteobacteria|o__Xanthomonadales|f__uncultured|g__uncultured	0	0	0	0	0	0	0	0	0	0	0	0	0	0	0	0	3.83848e-05	0
k__Bacteria|p__Spirochaetota|c__Spirochaetia|o__Spirochaetales|f__Spirochaetaceae|g__Spirochaeta	0	0	0	0	0	0	0	0	0	3.83848e-05	0	0	0	0	0	0	0	0
k__Bacteria|p__Verrucomicrobiota|c__Chlamydiae|o__Chlamydiales|f__cvE6|g__cvE6	0	0	0	0	0	0	0	0	0	0	0	0	0	0	0	0	0	0

## Sheet: B
Tax				P
k__Bacteria.p__Firmicutes	5.85505	HFD	5.21526	0.00146439
k__Bacteria.p__Bacteroidota	5.71439	NCD	5.34383	0.00322494
k__Bacteria.p__Actinobacteriota	5.40647	Sema	5.0742	0.00243564
k__Bacteria.p__Verrucomicrobiota	5.18865	Sema	4.83329	0.00290273
k__Bacteria.p__Firmicutes.c__Bacilli	5.68367	HFD	4.94088	0.0183156
k__Bacteria.p__Bacteroidota.c__Bacteroidia	5.71439	NCD	5.34391	0.00322494
k__Bacteria.p__Actinobacteriota.c__Coriobacteriia	5.38374	Sema	5.07724	0.0011388
k__Bacteria.p__Verrucomicrobiota.c__Verrucomicrobiae	5.18865	Sema	4.83332	0.00290273
k__Bacteria.p__Bacteroidota.c__Bacteroidia.o__Bacteroidales	5.71415	NCD	5.344	0.00309559
k__Bacteria.p__Firmicutes.c__Bacilli.o__Erysipelotrichales	5.4635	HFD	4.92569	0.0102058
k__Bacteria.p__Actinobacteriota.c__Coriobacteriia.o__Coriobacteriales	5.38374	Sema	5.07724	0.0011388
k__Bacteria.p__Verrucomicrobiota.c__Verrucomicrobiae.o__Verrucomicrobiales	5.18865	Sema	4.83348	0.00290273
k__Bacteria.p__Firmicutes.c__Clostridia.o__Oscillospirales	4.86568	Sema	4.39352	0.0403354
k__Bacteria.p__Firmicutes.c__Clostridia.o__Peptostreptococcales_Tissierellales	5.09421	HFD	4.74535	0.000911882
k__Bacteria.p__Firmicutes.c__Clostridia.o__Clostridia_UCG_014	4.41131	Sema	4.00454	0.00320588
k__Bacteria.p__Firmicutes.c__Bacilli.o__Erysipelotrichales.f__Erysipelotrichaceae	5.46342	HFD	4.93304	0.0073128
k__Bacteria.p__Bacteroidota.c__Bacteroidia.o__Bacteroidales.f__Muribaculaceae	5.6777	NCD	5.35329	0.0021167
k__Bacteria.p__Verrucomicrobiota.c__Verrucomicrobiae.o__Verrucomicrobiales.f__Akkermansiaceae	5.18865	Sema	4.83348	0.00290273
k__Bacteria.p__Actinobacteriota.c__Coriobacteriia.o__Coriobacteriales.f__Atopobiaceae	5.36891	Sema	5.0818	0.00309559
k__Bacteria.p__Firmicutes.c__Clostridia.o__Peptostreptococcales_Tissierellales.f__Peptostreptococcaceae	5.09323	HFD	4.74661	0.000627185
k__Bacteria.p__Firmicutes.c__Clostridia.o__Oscillospirales.f__Oscillospiraceae	4.65958	Sema	4.21964	0.0292416
k__Bacteria.p__Actinobacteriota.c__Coriobacteriia.o__Coriobacteriales.f__Eggerthellaceae	4.68933	HFD	4.32068	0.0166796
k__Bacteria.p__Firmicutes.c__Clostridia.o__Clostridia_UCG_014.f__Clostridia_UCG_014	4.41131	Sema	4.00454	0.00320588
k__Bacteria.p__Bacteroidota.c__Bacteroidia.o__Bacteroidales.f__Muribaculaceae.g__Muribaculaceae	5.67577	NCD	5.35131	0.00221382
k__Bacteria.p__Verrucomicrobiota.c__Verrucomicrobiae.o__Verrucomicrobiales.f__Akkermansiaceae.g__Akkermansia	5.18865	Sema	4.83348	0.00290273
k__Bacteria.p__Firmicutes.c__Bacilli.o__Erysipelotrichales.f__Erysipelotrichaceae.g__uncultured	5.14643	HFD	4.80376	0.0033794
k__Bacteria.p__Firmicutes.c__Bacilli.o__Erysipelotrichales.f__Erysipelotrichaceae.g__Dubosiella	5.17165	HFD	4.68802	0.0039114
k__Bacteria.p__Firmicutes.c__Clostridia.o__Peptostreptococcales_Tissierellales.f__Peptostreptococcaceae.g__Romboutsia	5.08972	HFD	4.75401	0.000622425
k__Bacteria.p__Desulfobacterota.c__Desulfovibrionia.o__Desulfovibrionales.f__Desulfovibrionaceae.g__uncultured	4.43917	HFD	4.1219	0.024017
k__Bacteria.p__Actinobacteriota.c__Coriobacteriia.o__Coriobacteriales.f__Eggerthellaceae.g__Enterorhabdus	4.64561	HFD	4.28729	0.0106323
k__Bacteria.p__Firmicutes.c__Clostridia.o__Oscillospirales.f__Oscillospiraceae.g__uncultured	4.37421	Sema	4.00432	0.0023147
k__Bacteria.p__Actinobacteriota.c__Coriobacteriia.o__Coriobacteriales.f__Atopobiaceae.g__Coriobacteriaceae_UCG_002	4.76285	Sema	4.47819	0.000986956
k__Bacteria.p__Firmicutes.c__Clostridia.o__Clostridia_UCG_014.f__Clostridia_UCG_014.g__Clostridia_UCG_014	4.41131	Sema	4.00454	0.00320588
k__Bacteria.p__Firmicutes.c__Bacilli.o__Erysipelotrichales.f__Erysipelotrichaceae.g__Allobaculum	4.4838	NCD	4.18684	0.00241611

## Sheet: C
Tax				P
k__Bacteria.p__Firmicutes	5.85505	HFD	5.21526	0.00146439
k__Bacteria.p__Bacteroidota	5.71439	NCD	5.34383	0.00322494
k__Bacteria.p__Actinobacteriota	5.40647	Sema	5.0742	0.00243564
k__Bacteria.p__Verrucomicrobiota	5.18865	Sema	4.83329	0.00290273
k__Bacteria.p__Firmicutes.c__Bacilli	5.68367	HFD	4.94088	0.0183156
k__Bacteria.p__Bacteroidota.c__Bacteroidia	5.71439	NCD	5.34391	0.00322494
k__Bacteria.p__Actinobacteriota.c__Coriobacteriia	5.38374	Sema	5.07724	0.0011388
k__Bacteria.p__Verrucomicrobiota.c__Verrucomicrobiae	5.18865	Sema	4.83332	0.00290273
k__Bacteria.p__Bacteroidota.c__Bacteroidia.o__Bacteroidales	5.71415	NCD	5.344	0.00309559
k__Bacteria.p__Firmicutes.c__Bacilli.o__Erysipelotrichales	5.4635	HFD	4.92569	0.0102058
k__Bacteria.p__Actinobacteriota.c__Coriobacteriia.o__Coriobacteriales	5.38374	Sema	5.07724	0.0011388
k__Bacteria.p__Verrucomicrobiota.c__Verrucomicrobiae.o__Verrucomicrobiales	5.18865	Sema	4.83348	0.00290273
k__Bacteria.p__Firmicutes.c__Clostridia.o__Oscillospirales	4.86568	Sema	4.39352	0.0403354
k__Bacteria.p__Firmicutes.c__Clostridia.o__Peptostreptococcales_Tissierellales	5.09421	HFD	4.74535	0.000911882
k__Bacteria.p__Firmicutes.c__Clostridia.o__Clostridia_UCG_014	4.41131	Sema	4.00454	0.00320588
k__Bacteria.p__Firmicutes.c__Bacilli.o__Erysipelotrichales.f__Erysipelotrichaceae	5.46342	HFD	4.93304	0.0073128
k__Bacteria.p__Bacteroidota.c__Bacteroidia.o__Bacteroidales.f__Muribaculaceae	5.6777	NCD	5.35329	0.0021167
k__Bacteria.p__Verrucomicrobiota.c__Verrucomicrobiae.o__Verrucomicrobiales.f__Akkermansiaceae	5.18865	Sema	4.83348	0.00290273
k__Bacteria.p__Actinobacteriota.c__Coriobacteriia.o__Coriobacteriales.f__Atopobiaceae	5.36891	Sema	5.0818	0.00309559
k__Bacteria.p__Firmicutes.c__Clostridia.o__Peptostreptococcales_Tissierellales.f__Peptostreptococcaceae	5.09323	HFD	4.74661	0.000627185
k__Bacteria.p__Firmicutes.c__Clostridia.o__Oscillospirales.f__Oscillospiraceae	4.65958	Sema	4.21964	0.0292416
k__Bacteria.p__Actinobacteriota.c__Coriobacteriia.o__Coriobacteriales.f__Eggerthellaceae	4.68933	HFD	4.32068	0.0166796
k__Bacteria.p__Firmicutes.c__Clostridia.o__Clostridia_UCG_014.f__Clostridia_UCG_014	4.41131	Sema	4.00454	0.00320588
k__Bacteria.p__Bacteroidota.c__Bacteroidia.o__Bacteroidales.f__Muribaculaceae.g__Muribaculaceae	5.67577	NCD	5.35131	0.00221382
k__Bacteria.p__Verrucomicrobiota.c__Verrucomicrobiae.o__Verrucomicrobiales.f__Akkermansiaceae.g__Akkermansia	5.18865	Sema	4.83348	0.00290273
k__Bacteria.p__Firmicutes.c__Bacilli.o__Erysipelotrichales.f__Erysipelotrichaceae.g__uncultured	5.14643	HFD	4.80376	0.0033794
k__Bacteria.p__Firmicutes.c__Bacilli.o__Erysipelotrichales.f__Erysipelotrichaceae.g__Dubosiella	5.17165	HFD	4.68802	0.0039114
k__Bacteria.p__Firmicutes.c__Clostridia.o__Peptostreptococcales_Tissierellales.f__Peptostreptococcaceae.g__Romboutsia	5.08972	HFD	4.75401	0.000622425
k__Bacteria.p__Desulfobacterota.c__Desulfovibrionia.o__Desulfovibrionales.f__Desulfovibrionaceae.g__uncultured	4.43917	HFD	4.1219	0.024017
k__Bacteria.p__Actinobacteriota.c__Coriobacteriia.o__Coriobacteriales.f__Eggerthellaceae.g__Enterorhabdus	4.64561	HFD	4.28729	0.0106323
k__Bacteria.p__Firmicutes.c__Clostridia.o__Oscillospirales.f__Oscillospiraceae.g__uncultured	4.37421	Sema	4.00432	0.0023147
k__Bacteria.p__Actinobacteriota.c__Coriobacteriia.o__Coriobacteriales.f__Atopobiaceae.g__Coriobacteriaceae_UCG_002	4.76285	Sema	4.47819	0.000986956
k__Bacteria.p__Firmicutes.c__Clostridia.o__Clostridia_UCG_014.f__Clostridia_UCG_014.g__Clostridia_UCG_014	4.41131	Sema	4.00454	0.00320588
k__Bacteria.p__Firmicutes.c__Bacilli.o__Erysipelotrichales.f__Erysipelotrichaceae.g__Allobaculum	4.4838	NCD	4.18684	0.00241611
