# Supplementary material for: Effects of semaglutide on gut microbiota, cognitive function and inflammation in obese mice
Source: PeerJ. 2024 Aug 12;12:e17891. doi: 10.7717/peerj.17891 (PMC11326427; doi:10.7717/peerj.17891)
Supplement: Supplemental Information 10 [file peerj-12-17891-s010.xls]

## Sheet: Sheet1
	Var1	Var2	cor	pvalue
1	Akkermansia	TNFα	-0.43779	0.0692134
2	Muribaculaceae	TNFα	-0.494835	0.0368189
3	Coriobacteriaceae_UCG_002	TNFα	-0.0785124	0.756816
4	Clostridia_UCG_014	TNFα	-0.551653	0.0176273
5	Romboutsia	TNFα	0.482438	0.0425904
6	Dubosiella	TNFα	0.500774	0.034276
7	Enterorhabdus	TNFα	0.549303	0.0182172
8	Lactobacillus	TNFα	-0.458441	0.0556933
9	Akkermansia	IL6	-0.237481	0.34268
10	Muribaculaceae	IL6	-0.484504	0.0415835
11	Coriobacteriaceae_UCG_002	IL6	0.169421	0.501535
12	Clostridia_UCG_014	IL6	-0.575413	0.0124698
13	Romboutsia	IL6	0.568182	0.0138916
14	Dubosiella	IL6	0.395457	0.104302
15	Enterorhabdus	IL6	0.350026	0.154465
16	Lactobacillus	IL6	-0.21683	0.387457
17	Akkermansia	IL1β	-0.384298	0.115359
18	Muribaculaceae	IL1β	-0.398966	0.100987
19	Coriobacteriaceae_UCG_002	IL1β	0.0170543	0.94645
20	Clostridia_UCG_014	IL1β	-0.734884	0.000512627
21	Romboutsia	IL1β	0.549871	0.0180732
22	Dubosiella	IL1β	0.393595	0.106091
23	Enterorhabdus	IL1β	0.655992	0.00311418
24	Lactobacillus	IL1β	-0.268595	0.281166
