# Supplementary material for: Effects of semaglutide on gut microbiota, cognitive function and inflammation in obese mice
Source: PeerJ. 2024 Aug 12;12:e17891. doi: 10.7717/peerj.17891 (PMC11326427; doi:10.7717/peerj.17891)
Supplement: Supplemental Information 11 [file peerj-12-17891-s011.xls]

## Sheet: Sheet1
	Var1	Var2	cor	pvalue
1	Akkermansia	TSTQ	0.389061	0.110542
2	Muribaculaceae	TSTQ	0.536913	0.02159
3	Coriobacteriaceae_UCG_002	TSTQ	0.00206505	0.993511
4	Clostridia_UCG_014	TSTQ	0.654621	0.00319902
5	Romboutsia	TSTQ	-0.565824	0.0143822
6	Dubosiella	TSTQ	-0.547988	0.0185541
7	Enterorhabdus	TSTQ	-0.28999	0.243092
8	Lactobacillus	TSTQ	0.180599	0.473289
9	Akkermansia	NTCPA	0.445926	0.0636245
10	Muribaculaceae	NTCPA	0.497191	0.0357933
11	Coriobacteriaceae_UCG_002	NTCPA	0.18204	0.469704
12	Clostridia_UCG_014	NTCPA	0.595051	0.00918599
13	Romboutsia	NTCPA	-0.560326	0.0155793
14	Dubosiella	NTCPA	-0.670993	0.00230078
15	Enterorhabdus	NTCPA	-0.33129	0.179294
16	Lactobacillus	NTCPA	0.19036	0.449285
17	Akkermansia	TSD	0.448916	0.0616574
18	Muribaculaceae	TSD	0.0949923	0.707709
19	Coriobacteriaceae_UCG_002	TSD	-0.0836345	0.741448
20	Clostridia_UCG_014	TSD	0.427465	0.07682
21	Romboutsia	TSD	-0.324213	0.189331
22	Dubosiella	TSD	-0.349845	0.154692
23	Enterorhabdus	TSD	-0.49226	0.037965
24	Lactobacillus	TSD	0.351909	0.152107
25	Akkermansia	ASP	0.378741	0.121164
26	Muribaculaceae	ASP	0.219928	0.380543
27	Coriobacteriaceae_UCG_002	ASP	0.258131	0.301045
28	Clostridia_UCG_014	ASP	0.179659	0.475632
29	Romboutsia	ASP	-0.268456	0.281424
30	Dubosiella	ASP	-0.362229	0.139625
31	Enterorhabdus	ASP	-0.444788	0.0643852
32	Lactobacillus	ASP	0.341589	0.165335
